# Supplementary material for: Insights Into the Genetic Architecture of Complex Traits in Napier Grass (Cenchrus purpureus) and QTL Regions Governing Forage Biomass Yield, Water Use Efficiency and Feed Quality Traits
Source: Front Plant Sci. 2022 Jan 7;12:678862. doi: 10.3389/fpls.2021.678862 (PMC8776657; doi:10.3389/fpls.2021.678862)
Supplement: Supplementary file 2 [file Table_1.XLSX]

## Sheet: Sheet1
Supplementary Table 1. Markers diagnostic for purple colour. Markers genomic position, P-value, marker status, and protein associated with the marker sequences are shown.
Marker	AC	Pos	allele	P-value	Status1	Protein name
9994171	2	190390682	C/A	4.39e-11	CA	probable serine/threonine protein kinase
30282538	2	181775730	C/A	4.71e-11	CA/AA	NA
23641768	2	185828246	C/G	5.05e-11	CG	glucan endo-1,3-beta-glucosidase 3
23640854	2	195134132	C/G	8.39e-11	CG/GG	sucrose transport protein
10000565	2	189376936	G/A	1.62e-10	GA/AA	NA
100013546	2	194658440	0/1	6.59e-10	present	bifunctional epoxide hydrolase 2-like
100254243	2	184648641	0/1	4.9e-09	present	NA
100013603	2	186485183	0/1	1.14e-08	present	cysteine-rich receptor-like protein kinase 6
100205233	5	2091285	0/1	4.39e-11	present	F-box/kelch-repeat protein
100013579	5	3641263	0/1	4.39e-11	present	nuclear transcription factor Y subunit A-10
100013690	5	4065302	0/1	4.39e-11	present	glycine-rich protein DOT1-like
100248653	5	4447543	0/1	4.39e-11	present	glucan endo-1,3-beta-glucosidase 3
30291207	5	5016898	G/A	4.39e-11	GA/AA	Remorin family protein
100013697	5	5042774	0/1	4.39e-11	present	E3 ubiquitin-protein ligase
100013640	5	5137129	0/1	4.39e-11	present	diphosphomevalonate decarboxylase MVD2, peroxisomal-like
100013671	5	5189436	0/1	4.39e-11	present	hypothetical protein SEVIR_3G4NA32NANAv2
9897756	5	6133035	T/C	4.39e-11	TC/CC	NA
23641769	5	4445594	T/C	4.71e-11	TC/CC	glucan endo-1,3-beta-glucosidase 3
23636057	5	5305525	A/C	4.71e-11	AC/CC	NA
30279984	5	3860473	A/G	5.05e-11	AG/GG	NA
100238305	5	5456675	T/C	5.05e-11	TC	CASP-like protein 1B1
23618539	5	2845425	C/T	5.42e-11	CT/TT	NA
30291523	5	4425113	C/T	7.78e-11	CT/TT	Cysteine-rich receptor-like protein kinase
100084872	5	2094328	0/1	6.59e-10	present	protein NUCLEAR FUSION DEFECTIVE 4
100013725	5	5362130	0/1	6.59e-10	present	pyridine nucleotide-disulfide oxidoreductase domain-containing protein
23619969	5	2925440	C/G	1.23e-09	CG/GG	NA
100175270	5	5573326	T/C	5.87e-09	TC/CC	NA
100013560	Contig	3580397	0/1	4.39e-11	present	NA
100013713	Contig	3668674	0/1	4.39e-11	present	Protein DYAD [Zea mays]
100013728	Contig	3661428	0/1	4.39e-11	present	NA
100013587	Contig	14710884	0/1	4.39e-11	Present	NA
100013668	Contig	14640318	0/1	4.39e-11	present	putative disease resistance protein RGA3 [Sorghum bicolor]
100013753	Contig	4913757	0/1	4.39e-11	present	NA
100226402	Contig	53576032	0/1	6.99e-10	present	NA
23620218	Contig	4013735	0/1	6.59e-10	present	NA
100013533	Contig	53392183	0/1	4.39e-11	present	transcription factor CSA-like [Setaria italica]
100013681	Contig	3550755	0/1	6.59e-10	present	ankyrin repeat-containing protein ITN1 [Sorghum bicolor]
100013688	Contig	13179471	0/1	6.59e-10	present	NA
100013701	Contig	3350742	0/1	6.59e-10	present	NA
100013715	Contig	17569845	0/1	4.39e-11	present	NA
100013731	Contig	53302569	0/1	6.59e-10	present	NA
100013550	Contig	3074583	0/1	4.39e-11	present	NA
100013651	Contig	14224191	0/1	6.59e-10	present	NA
100013682	Contig	4830922	0/1	1.14e-08	present	NA
100013705	Contig	3584273	0/1	6.59e-10	present	NA
100013637	Contig	13657997	0/1	1.14e-08	present	NA
100013664	Contig	3551029	0/1	1.14e-08	present	NA
100013695	Contig	4792537	0/1	1.14e-08	present	anthocyanin regulatory R-S protein [Setaria italica]
100013658	Contig	14539440	0/1	4.39e-11	present	NA
100056507	Contig	4066457	0/1	1.14e-08	present	putative disease resistance RPP13-like protein 3 [S. bicolor]
100059647	Contig	4065953	0/1	6.59e-10	present	putative disease resistance RPP13-like protein
100013572	Contig	14302104	0/1	1.14e-08	present	NA
100013683	Contig	14296281	0/1	4.39e-11	present	NA
100013516	Contig	3908006	0/1	6.59e-10	present	NA
100013660	Contig	3818330	0/1	6.59e-10	present	NA
100013676	Contig	3666945	0/1	6.59e-10	present	NA
100013564	Contig	3572034	0/1	4.39e-11	present	NA
100155150	Contig	3509794	0/1	4.39e-11	present	NA
100013739	Contig	3491014	0/1	4.39e-11	present	NA
100013691	Contig	3052566	0/1	4.39e-11	present	NA
100013615	Contig	13089200	0/1	4.39e-11	present	formate dehydrogenase 1, mitochondrial [Setaria italica]
100013531	Contig	13156784	0/1	6.59e-10	present	NA
100090843	Contig	13171003	0/1	4.39e-11	present	NA
100013679	Contig	13250842	0/1	6.59e-10	present	NA
100013724	Contig	13317515	0/1	6.59e-10	present	NA
100152641	Contig	13325638	0/1	6.59e-10	present	NA
100013656	Contig	53479796	0/1	4.39e-11	present	NA
100013606	Contig	17999269	0/1	4.39e-11	present	NA
100013511	Contig	17635549	0/1	4.39e-11	present	Potassium transporter 3 [Zea mays]
100013711	Contig	17554107	0/1	6.59e-10	present	NA
100013580	Contig	17554048	0/1	6.59e-10	present	NA
100013745	Contig	17400274	0/1	4.39e-11	present	NA
100149825	Contig	17720984	0/1	6.59e-10	present	NA
100013756	Contig	16978444	0/1	1.14e-08	present	NA
100013639	Contig	16937149	0/1	1.14e-08	present	NA
100224588	Contig	16877709	0/1	1.14e-08	present	receptor-like protein kinase HSL1 [Setaria italica]
100013638	Contig	16868444	0/1	4.39e-11	present	NA
100013563	Contig	16739871	0/1	1.14e-08	present	NA
23628068	Contig	16685344	0/1	4.39e-11	present	NA
100013650	Contig	16684041	0/1	4.39e-11	present	NA
100109405	Contig	4459160	0/1	6.59e-10	present	NA
100013732	Contig	53307300	0/1	6.59e-10	present	NA
100109389	Contig	5049264	0/1	6.99e-10	present	NA
100013544	Contig	5660597	0/1	4.39e-11	present	NA
100013604	Contig	5612351	0/1	4.39e-11	present	NA
100013504	Contig	5597791	0/1	6.59e-10	present	bifunctional epoxide hydrolase 2-like [Panicum miliaceum]
100013513	Contig	5549416	0/1	4.39e-11	present	NA
100013673	Contig	5537078	0/1	4.39e-11	present	NA
100013655	Contig	5478539	0/1	4.39e-11	present	NA
100013740	Contig	5448610	0/1	4.39e-11	present	NA
100013654	Contig	53392084	0/1	6.59e-10	present	NA
100013657	Contig	5415336	0/1	4.39e-11	present	NA
100013529	Contig	5362229	0/1	4.39e-11	present	PREDICTED: pyridine nucleotide-disulfide oxidoreductase domain
100013613	Contig	5362163	0/1	6.59e-10	present	NA
100013719	Contig	5264586	0/1	4.39e-11	present	NA
100013661	Contig	5257994	0/1	6.59e-10	present	NA
100013738	Contig	4508809	0/1	4.39e-11	present	hypothetical protein [Candidatus Moranbacteria bacterium]
100013618	NA	NA	0/1	4.39e-11	present	NA
100013666	NA	NA	0/1	4.39e-11	present	NA
100013702	NA	NA	0/1	4.39e-11	present	NA
100013707	NA	NA	0/1	4.39e-11	present	NA
100109374	NA	NA	0/1	4.39e-11	present	NA
100109385	NA	NA	0/1	4.39e-11	present	NA
100013672	NA	NA	0/1	6.59e-10	present	NA
100013675	NA	NA	0/1	6.59e-10	present	NA
100013735	NA	NA	0/1	6.59e-10	present	NA
100013622	NA	NA	0/1	1.14e-08	present	NA
100013643	NA	NA	0/1	6.59e-10	present	NA
100013700	NA	NA	0/1	6.59e-10	present	NA
100013751	NA	NA	0/1	1.14e-08	present	NA
100013634	NA	NA	0/1	1.14e-08	present	NA
18062990	NA	NA	0/1	4.39e-11	present	NA
1Status = homozygous/heterozygous in the case of SNPs or present/absent in the case of SilicoDArTs, on purple genotypes; AC = Assembled chromosome, and is NA when the genomic position is unknown; Pos = position within AC
