# Supplementary material for: Insights Into the Genetic Architecture of Complex Traits in Napier Grass (Cenchrus purpureus) and QTL Regions Governing Forage Biomass Yield, Water Use Efficiency and Feed Quality Traits
Source: Front Plant Sci. 2022 Jan 7;12:678862. doi: 10.3389/fpls.2021.678862 (PMC8776657; doi:10.3389/fpls.2021.678862)
Supplement: Supplementary file 3 [file Table_2.XLSX]

## Sheet: Supplementary Tasble S2
Supplementary Table 2. Markers associated with the agronomic, morphological, and water-use efficiency traits detected by the BLINK and MLM models. Markers genomic position, allele, minor allele frequency (MAF), P-value, Tag sequences, and protein associated with the marker sequences are shown.
Soil moisture condition	Trait	Marker	AC	Pos	Allele	MAF	BLINK P-value	MM P-value	Tag_sequence	Annotation (NCBI_blastx)
WS-RF	TFW	IG100206033|F|0-67:A>G-67:A>G	B02	138389691	A/G	0.46	3.65415e-12	3.98	GTGGTGGTGTGTGTGTTTAAGCCTGTTTTCCTCGGTTTGGCTCTGAAGGTGCAATTTTGTGTTGCTGCA	scavenger receptor class F member 2-like
		IG8170757|F|0-17:C>G-17:C>G	B02	176171258	C/G	0.3	1.24831e-14	3.89	CGGTGCAGGCTGTGCGGCGCTTGTGCGCCTGGACGCAGGGGAGGCTGCA	putative box C/D snoRNA protein SPCC613.07 [Setaria viridis]
		IG100035697	A05	98061537	0/1	0.493976	1.08225e-09	5.13	TGCAGAGGAGAGTCGAGACGTCTAGTTTTTGTTCTAACTTGCCG	Transcription factor bHLH82 [Dichanthelium oligosanthes]
		IG100292170|F|0-44:C>T-44:C>T	B06	99625821	C/T	0.12	6.66962e-07	3.79	TGCAGTTCACCCTCACCTCACGCTGCACTGATGGTGCCGCTAGACGCCTACCGTGGCCGAGCAGATGGA	NA
		IG100125122	B04	106625607	0/1	0.409639	NA	5.36	GCGAGCTTTGAGCTTCCAGTTGCTGAGACGCTCGTATGCGACATCGCAGCAGCAGCAGCAGCAACTGCA	NA
		IG100357264	A01	41507129	0/1	0.41	NA	5.33	TGCAGTTACTACCGTCATTAGAGCAAATGGACGGAGGAGACGGCGCAGATTAATGATGGGCCGAGAAAG	NA
		IG100261294|F|0-47:G>A-47:G>A	A05	6373546	G/A	0.43	NA	4.88	TGCAGATTCATCAGGTACTCCGATCCTCAGCTTCTGCTGACGAAGCTGCGTTTCCTCGTGTTCCCGCTC	NA
		IG100244061	0	0	0/1	0.421687	NA	4.81	TGCAGAAGTGACCAAGTGGTCAAATACCACACCCG	NA
		D23600991|F|0-6:G>A-6:G>A	B05	34869947	G/A	0.28	NA	4.67	CGGCCGCGGAGGCGAGCTCGTCGGCGTCCGCTGCA	NA
		IG100123166	B01	124856971	0/1	0.433735	NA	4.42	TGCAGTGGAGCTTTAATTAAGAGATGTACGCAACAGATTATCTGCTCAATGTTGACTAGTTTTCCAGGC	NA
		IG100299277	B02	12603060	0/1	0.39759	NA	4.32	TGCAGCTGCTACATGTCGTCCTGTCAATGCCCAGTGCTCTATTCTGCGTATGGAGACGGCAGCCTCGTA	NA
		IG100220533	B04	109152986	0/1	0.457831	NA	4.31	TGCAGGGGCCACTCCTTTGTCCTGCCAGCTGTGGCTGTTGTTAAAGGACAAACTAACAACCAACACCGA	NA
		IG100293585	B01	1757903	0/1	0.325301	NA	4.16	TGCAGAGACTACAGAGTAGGAACACCAAATCCCGACCTGGAAAGAGTAGAGATCGATCTCCCG	NA
		IG100304862	A05	10363168	0/1	0.23	NA	4.14	CATGGAAAGACTCACCGTGCTGCTTCTTCCAGCTCCTCCAGTGCTCCCACCAGCCACAATCGCACTGCA	homeobox-leucine zipper protein ROC6-like [Setaria viridis]
		IG100310520	A02	29786794	0/1	0.23	NA	4.13	TGCAGCATCAGGTCAAGATAGGCGCGGCAGCCGCCGTCCG	NA
		IG100304215	0	0	0/1	0.17	NA	4.09	TGCAGTCCAAGGCTATAGTTTAGATTTAGAGGATTGTTGAACGACGTTTCCAAACATCAGCAGGTCACT	NA
		IG100015663	0	0	0/1	0.17	NA	4.09	TGCAGTTGTGCAAGAAGAATCCATAAAATCCGTAAAATAAAGTCTACAACTTTACTTAAGTTGGCCGAG	NA
		IG100025555	0	0	0/1	0.168675	NA	4.09	TGCAGTTCAGGCATGGCGACCTAGGGAGCAGGTGGGAGTGGATCCG	NA
		IG100268937	A05	8327241	0/1	0.17	NA	4.09	CCCTTGGGCAAGGAGGGACGTGTCGCGGGAGAAATGGTGTCGGTGCCAACAGATGAAATTATTCCTGCA	NA
		IG18158234|F|0-23:C>T-23:C>T	A07	25625548	C/T	0.1	NA	4.07	TGCAGCGAAGCGCAGCGGTAGAGCGCGGTCGGGAACACGCCG	NA
		IG100022274	A05	102871280	0/1	0.18	NA	4.02	TGCAGGCAGAAGGCGCATATCCCCCCGCCAGCGACAGCGGCCGCCGCCGCGGCGCTCCCG	NA
		IG100015869	B04	12308361	0/1	0.216867	NA	4.01	TGCAGTTTTCCCCAATCCAGTTCAAGGATGGTTTATTTCAGTAACGAATTTTAGATGTGGTGTTTTTTG	NA
	PH	D30269880	B01	143658560	0/1	0.11	5.23097e-08	2.33	TGCAGTGACGCAGCATGGCCATCCATCCCACTCCCCAGTCCCCAGTGCCACACCTCTTCTTCCTGGAAA	NA
		IG100028603	B01	173322345	0/1	0.43	8.2878e-20	4.12	CGGAGAGTACAAGGAACCCATCACCCAAAAAGATGCTGCA	23 kDa jasmonate-induced protein [Sorghum bicolor]
		IG100130437	A02	11754150	0/1	0.43	1.43126e-08	NA	TGCAGGTCTATAATCCAGTACACACTGTCACAAAACGCAAAACAGTCTCTGAGTTCGTTGGCAAATCAA	protein SHORT-ROOT 1 [Setaria italica]
		IG100235976	A04	675563	0/1	0.28	6.42777e-14	2.58	CGCCTAGTGGTAACAGTGTCACTGGCAATGGCAGCGGTCACGGAAAGAGAGGAGGAGCCAGCGGCTGCA	NA
		IG100209721	A04	116297696	0/1	0.24	6.59055e-07	NA	TGCAGCCCATCACCAAGCCGCGATCCAACACCACCAGCGACGATCAGCTTATTCAGCTCACACTACTAG	NA
		D23616394	B07	10351221	0/1	0.12	3.33179e-09	2.01	TGCAGAGCCTGATGCTAGCCAACAATAACGGCTACTCTCGTGTCCG	F-box/FBD/LRR-repeat protein At1g16930 [Setaria italica]
		IG100123166	B01	124856971	0/1	0.433735	NA	5.59	TGCAGTGGAGCTTTAATTAAGAGATGTACGCAACAGATTATCTGCTCAATGTTGACTAGTTTTCCAGGC	NA
		IG100244061	0	0	0/1	0.421687	NA	5.56	TGCAGAAGTGACCAAGTGGTCAAATACCACACCCG	NA
		IG100125122	B04	106625607	0/1	0.409639	NA	5.01	GCGAGCTTTGAGCTTCCAGTTGCTGAGACGCTCGTATGCGACATCGCAGCAGCAGCAGCAGCAACTGCA	NA
		IG100304862	A05	10363168	0/1	0.23	NA	4.73	CATGGAAAGACTCACCGTGCTGCTTCTTCCAGCTCCTCCAGTGCTCCCACCAGCCACAATCGCACTGCA	homeobox-leucine zipper protein ROC6-like [Setaria viridis]
		IG100304215	0	0	0/1	0.17	NA	4.62	TGCAGTCCAAGGCTATAGTTTAGATTTAGAGGATTGTTGAACGACGTTTCCAAACATCAGCAGGTCACT	NA
		IG100015663	0	0	0/1	0.17	NA	4.62	TGCAGTTGTGCAAGAAGAATCCATAAAATCCGTAAAATAAAGTCTACAACTTTACTTAAGTTGGCCGAG	NA
		IG100025555	0	0	0/1	0.168675	NA	4.62	TGCAGTTCAGGCATGGCGACCTAGGGAGCAGGTGGGAGTGGATCCG	NA
		IG100268937	A05	8327241	0/1	0.17	NA	4.62	CCCTTGGGCAAGGAGGGACGTGTCGCGGGAGAAATGGTGTCGGTGCCAACAGATGAAATTATTCCTGCA	NA
		IG100012316	B03	20022340	0/1	0.301205	NA	4.5	TGCAGGCAGGGTGCAGGCTGAGGGCTGGAGGAGGCGGCGGGGTGGGTTTCCG	NA
		IG100043543	B03	112842817	0/1	0.337349	NA	4.38	TGCAGTCTTGTGGAGATGGATGTACTCAAGGCGTTCCAGGGGCACAATTTCAGATGTGCCG	geranylgeranyl pyrophosphate synthase 7, chloroplastic [Setaria italica]
		IG100024213	0	0	0/1	0.228916	NA	4.34	TGCAGTAAGCACATGTACAGTGCAAATAAACCG	NA
		IG100264168	B01	17551628	0/1	0.45	NA	4.33	TGCAGCCCAACGTTGTTTATAGAGTGGAAATTTCTGGAGGAACCCTGAAATGTTGATTTAGAGGACAAT	NA
		IG100012194	0	0	0/1	0.180723	NA	4.33	TGCAGGTCGTATTTCTTTCCGTATTCTTGTCTTGTACCACTAAGCACTGTTCATTTGGCCATCACAAAT	NA
		IG100316782|F|0-49:A>G-49:A>G	B05	36343840	A/G	0.43	NA	4.3	TGCAGATGACCGAGGACTTCTCCGACAAGAACCTGGAGCTCCGCGCCGAAGCCTTCCTCCGCGACGCCG	BTB/POZ domain-containing protein At1g03010 isoform X2 [Oryza sativa Japonica Group]
		IG9968001|F|0-29:C>A-29:C>A	B01	45819827	C/A	0.36	NA	4.28	CTGAACTGTTGTTGCTGGTGTGCCAGAGGAGGCGATGCGGATACTGGAGCAGGGGGCCTCGAACCTGCA	Tetratricopeptide repeat (TPR)-like superfamily protein [Zea mays]
		D23600794|F|0-37:G>A-37:G>A	B05	62348567	G/A	0.09	NA	4.26	TGCAGCGAGGAGGAGGATGAGCGCGGCGACGGCGAGCGCCG	protein trichome birefringence-like 19 [Setaria viridis]
		IG100340789	0	0	0/1	0.47	NA	4.22	TGCAGGTCGTACCGCAGCGCCTGCCGCGCCTACCCGCCG	NA
		IG100109244	A02	59545770	0/1	0.2	NA	4.22	TGCAGCTGCTGTACATAACTCTACAACATGCAAGGTTTTCTACTCTGCCTGCTCTAGGTACCCTCCCCT	NA
		IG100003500	A07	64113866	0/1	0.27	NA	4.21	TGCAGATGGGAGAGATCCCAAACTTGCGGTTGCGGCGACAGGTTTTCCATGTTGACTTTGGAAATGCGC	NA
		IG100249346	A05	9904306	0/1	0.168675	NA	4.2	TGCAGGCCCTTGGGGATGGCCATCTGGCAGCAGCCAATTCCG	NA
		IG100135584	0	27063345	0/1	0.277108	NA	4.19	TGCAGCGGCGGCAGCCTCTTGGCATCGATGACCTCGATGACATTGCTAGTGTGTTCGACCTGGATTTCT	NA
		IG8170757|F|0-17:C>G-17:C>G	B02	176171258	C/G	0.3	NA	4.15	CGGTGCAGGCTGTGCGGCGCTTGTGCGCCTGGACGCAGGGGAGGCTGCA	putative box C/D snoRNA protein SPCC613.07 [Setaria viridis]
		IG100329557	0	0	0/1	0.301205	NA	4.14	TGCAGCAGATGGAGACTGATTTTGTGTCCG	NA
		IG100220725	0	0	0/1	0.0722892	NA	4.13	TGCAGGGTAAAAAGATTATACTGGTGTTGGTGGGCGACGAAGTTCAATGATGCAAATCGTGGTGCGGAC	NA
		IG8159145	A02	156072156	0/1	0.49	NA	4.1	TGCAGAGCAGATCGTTTGGATGACTGTGGGCATCCTGTTGCTCCTGTTCGGCGTGCAGCGCTTCGGCAC	potassium transporter 22-like [Setaria viridis]
		IG17985485	0	0	0/1	0.277108	NA	4.09	TGCAGAAAGGAGGAAAACACATAGCACAACCG	NA
		IG100111904|F|0-16:A>G-16:A>G	B01	192918119	A/G	0.27	NA	4.02	TGCAGGAGCAGCCCCAACTAGCAGGTGCACACATAGCTCTCTCTCAGGCATTGGAGCGAAGACCCGAGC	NA
		IG100020832	0	0	0/1	0.457831	NA	4.02	TGCAGCTCGGTCACGGGCGGCGGCGCTCCG	NA
	LL	D23625932|F|0-11:G>T-11:G>T	A01	97210236	G/T	0.1	NA	3.47	TGCAGATGGACGCGAACCTGCTGCACAGCATCTTGACTCTGCTCCG	Histone-lysine N-methyltransferase, H3 lysine-9 specific SUVH5 [Dichanthelium oligosanthes]
		IG100352133|F|0-26:A>G-26:A>G	A03	20568491	A/G	0.07	NA	4.1	CCTCACGGGGAGGCACGGCCACAAGCTCGCCGACCCATCCTTTCATGGCCGCCTCGCCCGCCACCTGCA	serine/threonine-protein kinase STY46-like isoform X2 [Setaria viridis]
		IG100007430	B03	27169784	0/1	0.1	5.36e-14	7.35	TGCAGCGTTTGTGCGGCGGACGGACTGAGATTGGACAGAGGAGCAGAGCAACGGGGGCGGCGGCACCGC	NA
		IG100324154|F|0-15:C>T-15:C>T	A07	31359525	C/T	0.35	5.83e-10	3.6	ACACCGAATCGAATACTATTGTGCTTGTTTTAATTCTTCTCTACTCAAATCAAGCTATCCTGCACTGCA	ABC transporter B family member 9-like isoform X2 [Panicum hallii]
		IG100362174|F|0-11:G>A-11:G>A	B01	154465091	G/A	0.12	NA	6.73	CCTCCTCGTCTTCGCGCTCGCCGTCGCCACCGCGCAGCTCGGATTCCTCGAGAAGCTCACCTTCCTGCA	probable ascorbate-specific transmembrane electron transporter 2 [Panicum hallii]
		IG100260114	A02	39474019	0/1	0.07	NA	5.56	TGCAGAGTGACACGCGTTCTCGCTTAGCGTTCTGGGCGCTTTATTAGTACACATACTCCTAGTTTGGTC	NA
		IG9972109|F|0-37:G>A-37:G>A	A06	8604490	G/A	0.14	NA	5.55	TGCAGAAAGCTCTTGCTAGAGTGAAGTCCATGGTTCAGTACCCAGATGCCCG	NA
		IG100127089	A01	48879986	0/1	0.27	NA	5.48	TGCAGATGACATATACATTCTCTTAGCTAACCATAGGCACTATCACAAGATGATGAATATAGAAGTTCG	putative disease resistance protein At1g50180 isoform X1 [Panicum hallii]
		IG100176232	0	0	0/1	0.240964	NA	5.45	TGCAGATTGGAGGCGGCACCCCG	NA
		IG100344227|F|0-9:C>T-9:C>T	A04	111442641	C/T	0.09	NA	5.43	TGCAGCTGCCCGAGGGGCTTCCGCCAGCGGCGGCCGCTCGAGTGGCGGCGAGACGACTACACGTCGGGC	G-type lectin S-receptor-like serine/threonine-protein kinase At2g19130 [Panicum hallii]
		IG100217847	A07	7284450	0/1	0.2	NA	5.34	AGTGGGCTCAGTGGGGCTGAGTGGTGGATTGGCGCTGTTTTGGAGGGGAGATATTACGGTGTGCCTGCA	NA
		IG100002741	A01	190248750	0/1	0.08	NA	5.29	TGCAGAGTGCAAGGCTTGTCTTGAGGATATACTTGGAATGTTGCTGTTTCTTTCTGATGAGCAGCAGAC	retrotransposon protein, putative, unclassified [Oryza sativa Japonica Group]
		IG100289793	A04	55178281	0/1	0.08	NA	5.29	CGGACATGGACTCCAGCTTCGGCTGAGAAACTGCA	NA
		IG100001021	A05	94117035	0/1	0.08	NA	5.29	GTTATCTCGAGTCAGTTTCACAGTTGCACGAACATAGCTGCTTGACTAGTATCTGCATTGTATTCTGCA	putative laccase-9 [Setaria italica]
		IG100265714	B04	89420596	0/1	0.08	NA	5.29	GAGGCCATGACCCCACACACCACCCGCCTCGCCCACTGCCCTAGCCTCACAAGTGGAGTCCGCCCTGCA	NA
		IG100004319	A07	12472529	0/1	0.0843373	NA	5.29	TGCAGGAATCTCATGGATGCTCAGCTCGTTGGAAGTTTCTGGCTGAGCCGCGGCCTCCAGAGCTTTAGT	NA
		IG100201249	A01	76096523	0/1	0.06	NA	5.15	TGCAGAATCTCAATCTCAGACTAACATGGGCCCTGCTACTTGCAGTAAAGTTCAAAAAGGCTAAGCACA	transmembrane protein 87B [Setaria viridis]
		IG100017625	A07	65121265	0/1	0.192771	NA	5.07	TGCAGATCGATCGATGCGCGCGGCGGGTTTCCTTACCG	homeobox protein knotted-1-like 1 [Panicum hallii]
		IG100000697	B02	170471983	0/1	0.07	NA	5.04	TAAAAAAAGGGAAATAATACTAGGAACTGGAATATTTTTTTCCTTCGACGTTTTAGGTTCAGTTCTGCA	NA
		IG100223304|F|0-18:T>C-18:T>C	0	0	T/C	0.28	NA	4.9	TGCAGTACTGCACAGTGATGCGACGGCCGTGGCTGAAATGTGGGGTCGGTCTGGCACGCCTTGACGTCG	NA
		IG100356234	B07	393133	0/1	0.06	NA	4.9	TGCAGGCAAACAATGTTGTAGTAAAATTCTCTCCTTTTTTTTCTTGATCAGCAGTTCAACACTGGTTGA	NA
		IG100031187	0	0	0/1	0.11	NA	4.87	TGCAGGGCGTCCATCCTCCCCATCCCACCACCGCCGTCATCCGCAGCTGCCGTGGCAATGGCTTGACGC	NA
		IG100309471|F|0-35:A>G-35:A>G	B04	69606774	A/G	0.11	NA	4.87	TGCAGAACTGGCTCACCTCCAGTGGATACTTCCTGAAAGCAGGCTCAAACCG	NA
		IG100106883	B03	3549632	0/1	0.337349	NA	4.86	TGCAGCGTTGCTTTTTTGAGGGTGCCCCAAGGAGAGAGAGCAGTTAAGTCTGGGCGCTTCACGCTGGAC	NA
		D23612288|F|0-21:T>A-21:T>A	A07	43844422	T/A	0.12	NA	4.82	AAAAATACACTACTGGTACAACAGCCTGTGGTCCCAGGCTTCGTTTCACACATACTTGTACACGCTGCA	NA
		IG100039086	A01	168578123	0/1	0.45	NA	4.76	TGCAGCAATTGTTCCTCCGCAGAAACAAACCTAGAATACGCCGTGAATCTCCATTCTCTGCTCCCAGGT	NA
		IG100289796	A03	70728923	0/1	0.0963855	NA	4.74	TGCAGTTTGATCAAATTTTCTTTGGCAAAAGGACCG	NA
		IG100315019	A04	19354223	0/1	0.07	NA	4.73	TGCAGCACATGATGTTTATATATATGCTATGTACATCCTGCTCTGGCTTTGGAGTTCGATCCAATGACG	NA
		IG100020809	B07	37307768	0/1	0.07	NA	4.64	CGGCCGCCGCCGCAGCGACCACGCGGTGGCAGGGCGAGCTGCA	spidroin-2 [Sorghum bicolor]
		IG100039169	B01	76549183	0/1	0.2	NA	4.63	TGCAGTTAGTTGTTGATGAAAAACGTCCTCTGTTTTTTGAAAATTCGAACTCTTCGAAATGTTTTGTAA	NA
		IG100258820	A07	97648950	0/1	0.19	NA	4.6	TGTCCGATTGTGTCTGATCGTTGCGTCTTTCTGTCCTATTCCAATCTTGGCAGTAACCCTCGGACTGCA	NA
		D23546157	B04	40618761	0/1	0.13	NA	4.59	TGCAGATCAGCACATCGCCAGTCGTCGTTATTCGTAAGAACCACATGAACAGACAAGATCGTCATCTCA	NA
		IG100009472	B06	27110402	0/1	0.349398	NA	4.53	TGCAGGACTGTTCGTTCCGCCGCCGCCCGATCCCATCGGACGGCCACCATCTAACACGTATGTGGGCCC	NA
		IG100204899|F|0-11:C>T-11:C>T	B04	77567023	C/T	0.11	NA	4.49	TGCAGATCTTCCAACAAAAAGTCCCTTTCCCGCCAAAGCTCTCGCGCAACCGATTCCATAACCGTCGAT	NA
		IG100015869	B04	12308361	0/1	0.216867	NA	4.48	TGCAGTTTTCCCCAATCCAGTTCAAGGATGGTTTATTTCAGTAACGAATTTTAGATGTGGTGTTTTTTG	NA
		IG100315019|F|0-26:C>G-26:C>G	A04	19354223	C/G	0.18	NA	4.47	TGCAGCACATGATGTTTATATATATGCTATGTACATCCTGCTCTGGCTTTGGAGTTCGATCCAATGACG	NA
		IG100212793|F|0-21:T>A-21:T>A	A07	43844422	T/A	0.14	NA	4.46	TGCAGCGTGTACAAGTATGTGTGAAACGAAGCCTGGGACCACAGGCTGTTGTACCAGTAGTGTATTTTT	NA
		D23558264	0	0	0/1	0.24	NA	4.46	TGCAGGTTGAAGCATGCCCAGCCGTACCG	NA
		IG100260080|F|0-18:A>G-18:A>G	A07	65093458	A/G	0.27	NA	4.43	TGCAGAGTCCCCCGAGAGACCTTCGATGGTGACGAAGTAGGCCTCCCTGGAGACGGCCCTAGCGGCGCC	NA
		IG18130687	B05	95313758	0/1	0.19	NA	4.39	TGCAGTCTTGAGCACTCGATGCTTGAACAATTGATGGATTATTTCTTTGCAGAGAAATTATAATGCCTG	NA
		IG100174653	B01	22895209	0/1	0.11	NA	4.38	TGCAGAAGCCACAGTGGAGGAGAGAAACAACCG	NA
		IG100265708	A04	125174815	0/1	0.07	NA	4.37	TGCAGCGCGCTTGCAGTTGCAGGCGAAGGGTGGTGACGACGTCGTGGATAGATGGACAAGTGGTCGCCG	NA
		D30282912|F|0-48:T>C-48:T>C	B01	91972094	T/C	0.13	NA	4.35	TCCATCCAAATCCATGCATGATGCATGCTCGCTTTGCCCGCTTTCGAGGCTACCGAGCCAGCAGCTGCA	NA
		IG100005399	A05	104295271	0/1	0.14	NA	4.33	GAGCAAACGTTTCAGCGCATCCTCTCCAAGGGATAAACCAGCTACAGAGCAGCGCGTGGCGATGCTGCA	NA
		IG9993454|F|0-6:C>T-6:C>T	0	0	C/T	0.3	NA	4.32	TGCAGGCTGCGGCAGAAAGTGAGGCCG	NA
		IG100092498|F|0-14:A>C-14:A>C	B04	33032404	A/C	0.19	NA	4.29	TGCAGAATGGACACACCATGGATGCATCGCTTTCAGATCTGGTCACTGAAAGGACATAAACAGATTTTT	NA
		IG100216465|F|0-19:G>C-19:G>C	A01	15366420	G/C	0.06	NA	4.28	TGCAGGACCTTATGGACTAGTACTACGACGTGGTGCTGTGCACGGCCGACGCAGGGGCGCGAGCGGCAC	NA
		IG100039128	A05	36617458	0/1	0.156627	NA	4.26	TGCAGGAACGAGAGCGATGTCTCAAGAGCCAAGAGCCAGTGCGTTACGCCTACTACGCTAGAAGAAACG	NA
		IG100199484|F|0-65:G>T-65:G>T	B03	106076941	G/T	0.39	NA	4.2	TGCAGTCGGCGCCGTTGCCGCACGCGTAGTCCAGCGCGTTCTTCAGCCGCGCGTCGCCGACGGCCGCGT	glucan endo-1,3-beta-glucosidase 3-like [Sorghum bicolor]
		IG100125756	A06	29958897	0/1	0.13	NA	4.18	TGCAGTTTGGCACTAATCCTAGTTTGACAGATTCTAATTATATCATTATCTGTTGACTGCATTTTTTTG	NA
		IG100128828	A04	624798	0/1	0.313253	NA	4.18	TGCAGCTCCTGCACTGCACGACGTGTGACCAATACCTGTTGACGCCATTAGAAAACGATGTATCACAAG	NA
		IG100001981	B01	4027858	0/1	0.11	NA	4.18	TGCAGAGAGCAGGTTTCTAAAAAACAAAATATGCTGGCTGCTGGTCATGAATTTCCTTACATTCCCTTG	NA
		IG100000353	B01	4043781	0/1	0.11	NA	4.18	TGCAGAAAAGTTAGTCCTTAATCTGTTGCAGCCAATTTATGGCTACATTTCACGAACTATGTTTTCTCT	NA
		IG100098908	B01	5078283	0/1	0.11	NA	4.18	CGTCGTGTACGTGTGGTGGGCGTGATAAGCATGTTTGCAAATTTGCAAAACCTCTATCCTCTTGCTGCA	NA
		IG100287281	A01	28721513	0/1	0.325301	NA	4.17	TGCAGGAAATCAAGCTCAAACAGCCCATCTACACGCCTTCCTCTGCCGACGAGTTCGCCG	NA
		D30279456	B01	159625894	0/1	0.23	NA	4.16	TGCAGCGAGCCAGCGGCAAGCGCGTAGTGGTAGGCGGGCAGCGAGGGCTGCGCCGCCGCAGTGACAGTT	NA
		IG100026213	A03	32679237	0/1	0.216867	NA	4.15	TGCAGAGGATCTCGTCGCCAGTTCGGCACTGGCAGCAGCAGGAACCCAAACTCGACGGAACCAGGGAGG	NA
		IG100029352	A03	23655329	0/1	0.204819	NA	4.13	TGCAGTCGCGGCCCAGCTTCAGAACGCCTCTCACATTCCG	NA
		D23588365	A02	62217928	0/1	0.25	NA	4.1	TGCAGTTGTCGCCGAGAATTTCGCATTTGCTGATGTATGTACAGTTCTTCTAACTGTTATAGGCATCGG	NA
		IG100299546	A07	96280732	0/1	0.4	NA	4.09	TGCAGCTTATTATTGCAATAAATTTGATTTCTTCTCCTGAATCGGAACAGAGTGCAAGGAGTACTTCAG	NA
		D23614157	B07	15292793	0/1	0.1	NA	4.07	TGCAGTAGCATACTTGCTGTGGTAGAACATCGATCGGCAGCCGTAGGGATGCGCAACCGCCG	NA
		IG100300215	B03	36830515	0/1	0.08	NA	4.06	TGCAGGACCAAGAGAATAACAAATAGGATTCGCAGCAAGTCTGAATCTCTCAGGAGATCGATCTGGCTC	NA
		IG100308709	A01	182809222	0/1	0.433735	NA	4.04	TGCAGATCTAACGGCTGGTCTGCCGCATGAGGCTTTCCCCACCGATAACGCCGCGCTCCGCAGACACAC	NA
		D23616973	A03	57103792	0/1	0.25	NA	4.04	CGGGGAGCAGAGCAGGTAGGGGCGGTGCCGTTCTGCTGCA	NA
		D23602775	A01	1388340	0/1	0.28	NA	4.04	TGCAGGCTAGCGAAAATGGCATGCCTTTCCACGTGCTCCTGAGAATGGAATGCCG	NA
		IG100351560|F|0-11:A>G-11:A>G	B04	28876385	A/G	0.13	NA	4.03	GCCGCTCGTGGCGGCGCTCTGCTTCCACCAGCTGTTCGAGGGGATGGGGCTCGGCGGTTGCATCCTGCA	putative zinc/iron permease [Helianthus annuus]
		IG100287887	0	0	0/1	0.28	NA	4.01	TGCAGGCCCCACGTCCATGACCTGCCCG	NA
		D8170770|F|0-34:C>A-34:C>A	A03	44000895	C/A	0.1	NA	4	CGGGTAACTGGTGGAGAGGCGGTCGGGCGGCGCGTCCCGCTGCA	NA
		D23631590|F|0-28:C>T-28:C>T	A01	15223114	C/A	0.11	NA	4	CGGCGTAAAACCTGCTGAACATGCCAGTAATAAGCTGCTGCA	NA
	LW	IG100360321	A05	3541563	0/1	0.28	1.58e-07	NA	TGCAGTGTTTGTGGATGGGCACAGAGAAGGTGCTTCCTGTCAGCAAGTTCTTCCGCTAATTCCTTCTGG	UDP-N-acetylglucosamine transferase subunit alg13 [Striga asiatica]
		IG100007430	B03	27169784	0/1	0.1	5.17e-10	5.47615	TGCAGCGTTTGTGCGGCGGACGGACTGAGATTGGACAGAGGAGCAGAGCAACGGGGGCGGCGGCACCGC	NA
		IG100287218|F|0-5:G>C-5:G>C	B04	15150366	G/C	0.43	2.45e-20	3.72797	TGCAGGTTGGGATAACAGGATAAGGACGACGGTGCGGTGGCCCCG	NA
		IG100279889	B04	112065038	0/1	0.36	2.64e-12	2.05417	AAAAAAAAGGAGGCACGTCACGTCGCTCCCTTTTCTTCGTCCTGGTACTTTAGTACACTTGATACTGCA	NA
		IG100270314	B06	40015947	0/1	0.22	1.92e-07	2.45225	ATCGAATAGCAGCAATGACGAGTCGACAGCTGAGATGATGTGATGTCTGACAAGCGTGTCATGCCTGCA	NA
		D23546102	A07	5136769	0/1	0.46	9.32e-10	NA	TGCAGATAGACAGGCAGCACACATCATTCGAGCAGTAGACCTGTCTTGCATTGTTAATAGTTCAGCACG	NA
		IG100099800	B06	4489089	0/1	0.34	6.01e-06	NA	TGCAGCACGCGCCCTCCCGTTGAGAAGACACGGCGCGCGCGGTGGTGCCGCCACACGTATCGCCCACGC	NA
		IG100270314	B06	40015947	0/1	0.22	2.9e-07	NA	ATCGAATAGCAGCAATGACGAGTCGACAGCTGAGATGATGTGATGTCTGACAAGCGTGTCATGCCTGCA	NA
		IG100328296|F|0-45:C>A-45:C>A	A06	23498160	C/A	0.14	NA	6.05	CGGAACACCGCGTCCTGCCCTGCCTCCACCCCCAGCAGCCCTGCGACGAGCTGCA	desiccation-related protein PCC13-62 isoform X1 [Setaria italica]
		IG100092244	B02	141889888	0/1	0.06	NA	5.3	GGGCAATGGCGGCGCGGTGATCGGCGGACGGAATGCTCGGCGGCCTGGTTCGGGAGGGGTTATTCTGCA	NA
		IG100268745|F|0-47:T>C-47:T>C	A01	83467609	T/C	0.27	NA	4.63	TGCAGGAACCGCATGTGACAGTTGAGCGGCCCGTTGACGAGCAGCGCTGGGATCAGGCCCCG	Protein DETOXIFICATION 16 [Dichanthelium oligosanthes]
		IG100020809	B07	37307768	0/1	0.07	NA	4.59	CGGCCGCCGCCGCAGCGACCACGCGGTGGCAGGGCGAGCTGCA	spidroin-2 [Sorghum bicolor]
		IG100236441	A04	146627117	0/1	0.39759	NA	4.44	GGATCTGGTCCTGCTCCACCGTTTGAAGGCCTGCACCATCGTCTTGCTCGGCGTCATGGGTCGACTGCA	NA
		D30269297	A05	86426358	0/1	0.08	NA	4.35	TTTGCCTCCATCTCGAGCGTCTATTTTCGATCACACGTCTCCACAACTTTCCAAGCAAAAGGGCCTGCA	NA
		IG100201249	A01	76096523	0/1	0.06	NA	4.33	TGCAGAATCTCAATCTCAGACTAACATGGGCCCTGCTACTTGCAGTAAAGTTCAAAAAGGCTAAGCACA	transmembrane protein 87B [Setaria viridis]
		IG100176232	0	0	0/1	0.240964	NA	4.27	TGCAGATTGGAGGCGGCACCCCG	NA
		IG100279003	A01	181899580	0/1	0.29	NA	4.26	ACGGCAAGCTGAGATCTTCTTTGGCCTCTGAAGATTTTTATCCAGATGATGAGATGGAAGCAGCCTGCA	NA
		IG100039887	0	0	0/1	0.16	NA	4.13	TGCAGAGCGTCAGACACAGAACACCAGCGCCGTTTAAGGAGGGCTCGTTCGGTTATATCGGATTAGGCT	NA
		IG100183593|F|0-14:G>C-14:G>C	0	0	G/C	0.12	NA	4.09	TGCAGTCTTGTTTGGGATTTGGGCCG	NA
		IG100344227|F|0-9:C>T-9:C>T	A04	111442641	C/T	0.09	NA	4.05	TGCAGCTGCCCGAGGGGCTTCCGCCAGCGGCGGCCGCTCGAGTGGCGGCGAGACGACTACACGTCGGGC	G-type lectin S-receptor-like serine/threonine-protein kinase At2g19130 [Panicum hallii]
	TN	IG100292280|F|0-64:T>G-64:T>G	A01	58504312	T/G	0.06	9.34921e-18	4.57	CCCCAAGCGGCAAATTCTTGAGCAGCTGCCTGTCGTTGTCGTCGGCTTTCGGGAAGAAGCAGTTCTGCA	protein DMP10 [Setaria italica]
		D23624844|F|0-15:C>A-15:C>A	A02	25766248	C/A	0.4	NA	2.24	GCGGCCGTTAATGGCGGCCGCGCTGACCCCACTCTGAACACCTTCTCACTCCTGGTTCCCGCCACTGCA	DNA topoisomerase 3-beta isoform X2 [Setaria italica]
		IG100277944	A03	5164119	0/1	0.07	NA	2.12	TGCAGGACGTCGAGATCCTTCCTCCAATTCGTGGGAGTGTGGGACTGGGTGGAGGACGTACAACTCCTA	NA
		IG100028141	A05	28279352	0/1	0.3	NA	4.84	TATTGCGCTCCTTCCACCATAACCAGAGGAGGCACATTACCTTCATTTGTTCGGCATCCTTCAACTGCA	retrotransposon protein, putative, unclassified [Oryza sativa Japonica Group]
		IG100362117	B01	192258270	0/1	0.12	NA	5.15	GTTCAACAAATTCAATGTCTGGTTAGGTATCTTTATATTCCCACAGACAACAGAAAGTGCACAGCTGCA	disease resistance protein RGA2-like isoform X3 [Setaria viridis]
		IG100322676	B04	101603239	0/1	0.4	NA	5.11	GACGACCAAAGTACCTAGCAGTAGCAATTTGGAGGTAGAAGAAGAAGGGAAAGGGAGGAGTTACCTGCA	beta-glucosidase 6-like [Panicum hallii]
		IG100012471	B01	11204835	0/1	0.0963855	NA	4.93	CTCGGGCCGTGGTCCAGGCGCACGACCCCCGCGCCAAGGTCAGTCACCATCACCTCCTCCATCTCTGCA	CRAL-TRIO domain-containing protein YKL091C [Setaria italica]
		IG100010753	0	0	0/1	0.13253	NA	4.9	TGCAGTCTCAGAGCATTGATCTGGCGGCGACCG	NA
		IG100182570	0	0	0/1	0.13253	NA	4.9	TGCAGGTCGTGGAGCAGGGCTGTGGTGGCGGCGTGCAAGGCCG	NA
		IG100008936	A01	26300101	0/1	0.13253	NA	4.9	TGCAGCTTGTACTCCGCGGCGAGGAGCTCGGCCAGCTTGGAGACGACGCTGCCAATTGCCCCG	NA
		IG100014697	A01	62747528	0/1	0.13253	NA	4.9	TGCAGTGGAGAAGAAGATGGGGAGGCGGACGAAGAAAATGAGAAGAGGAGGGGAGGAAAGGGAGAGGGA	NA
		IG100012616	A01	66869117	0/1	0.13253	NA	4.9	TGCAGGTTAGGTATCCTCTCTGGTGGAGCACAGAGAGCGTATGGCTGCTGTGTTTGGTCGCCAAGGTAG	NA
		IG100027639	A06	11261213	0/1	0.13253	NA	4.72	TGCAGGTCGCCGCGTCCCTCGCGGCATCAGCATCATTCCCCATCTCTCTGTCCCAGCACCCG	NA
		IG100007210	0	0	0/1	0.24	NA	4.53	TGCAGCGGCTCCAGAGGATGAATCCTCTATTTTTAAAGGTCCAGGTTAGGTAACCGTTGCGGATAGTGT	NA
		IG100004922	B01	95804657	0/1	0.29	NA	4.47	TGCAGCAGCGATGGAATTCAAGGACCTCGTTCTCTCTGCGGTTCAGTGGTGATGGGCACACACACGTAC	NA
		IG18165199|F|0-33:A>G-33:A>G	B05	101808649	A/G	0.2	NA	4.41	CGGATCATCTTTGGGCTTTTTGGGGAGACGGTCCCTAAAACTGCA	NA
		IG100276656|F|0-50:C>T-50:C>T	A07	65279888	C/T	0.25	NA	4.34	TGCAGTTTATATGCAGATAAGGTGTGAGCACAAAAGGGCAAAAATGAAGCCGAACAATGGATCTTCTGC	Transcription factor bHLH110 [Zea mays]
		IG100029702	A01	194732797	0/1	0.27	NA	4.32	TGCAGGACTCGAGGCTGTCAACAGAACAGAGTGTGATGATGGGGATGAATTGATGACGCAATCCAGGGA	NA
		IG100020909	0	53712367	0/1	0.156627	NA	4.32	TGCAGCTCTTCCCCACGCCCGACGTCGCCTCCTCCTGCGTCACCTTCGCCTCCG	NA
		IG100183295	0	0	0/1	0.0963855	NA	4.3	TGCAGTCATGGAGGTGGCTGCGAAGGCGACGTCCCCGCGCCGCGGAGGGGCTCCG	NA
		IG100224015	0	0	0/1	0.24	NA	4.29	TGCAGTCACGTCTATTGACTGCTTTCTGCACTCGCTTCATTTGTGCCATCTCTTTGAGATCCAACAGCG	NA
		IG100260270|F|0-16:T>G-16:T>G	A07	73349601	T/G	0.45	NA	4.28	TGCAGATAAACAAGCGTGGCGAGACGGTGGACGAGAAGATCAAGAAGCTGGACGAGGAGCTGGCCAGGT	SNF7 family protein [Zea mays]
		IG100215916|F|0-47:T>G-47:T>G	A07	22726931	T/G	0.3	NA	4.24	TGCAGGAACACCACTAGAAACTGCAACCACATTGGATCTCGGGCGCTTGGGACATCGGCCTCAGTTTTT	NA
		IG100180820|F|0-19:C>T-19:C>T	B01	36507025	C/T	0.32	NA	4.24	TGCAGGAGTCGATGATCCACGCGTCCCTGTGCCTGTGGCCG	F-box protein At1g30790-like [Sorghum bicolor]
		IG9892987	0	0	0/1	0.349398	NA	4.19	TGCAGACATTCTTCGATGAAGAAGAGGGCTTCCTTGTCCAGGATTGTTGCATTGTTGAAGTGGAAGTGA	NA
		IG100205614	0	0	0/1	0.28	NA	4.18	TGCAGATTGAAAATTTAGCTGGGAGCCACGCGCTCAAGGCAGCCATGATACTGGATCTGTTCGGTCTCA	NA
		IG9967770|F|0-32:G>A-32:G>A	A01	46270009	G/A	0.07	NA	4.17	TGCAGGTCAGGGCCATGGCCGCCATCGCCGTCGGGTTGGGGCGTCGGGGGAAGGTCCAGGAAGTCGGAC	NA
		IG100008807	0	0	0/1	0.13	NA	4.15	TGCAGCTTCGTAATGGAACCGTATTCATGAAGCATGATCTCATGCGTGACCTTGCTCGAGATGTTGCTG	NA
		IG100208833|F|0-20:A>T-20:A>T	A01	77658387	A/T	0.07	NA	4.15	TGCAGCATGCTCGAGTCTCGAGTCTCTCTCACGCCGATAACACACCAAGAAAATCTCAGCACCTTAGGG	NA
		IG100113904	0	0	0/1	0.144578	NA	4.15	TGCAGGCCGAGCTGCTCGATGGGCTCCCACACCCGCTTGACCTTCTCAGCCCTGGAGAGCAACGGCGGC	ABC transporter G family member 19 [Dichanthelium oligosanthes]
		IG100095068	A03	1586720	0/1	0.14	NA	4.15	TGCAGAGCTCAATTGCCTGGTATTGGCCCTACAGGTAAGTTACAGTGTTCTGGCGCAGGAAGAGACCTT	NA
		IG100120882	0	0	0/1	0.108434	NA	4.11	TGCAGTCAGGTCGGGGCAGTTGACAAAGCAGCGGGAGACTCCGTGGTGGGTCAACGAGAAGGACACGAC	NA
		IG100009233	B05	52793520	0/1	0.204819	NA	4.1	TGCAGGAAGGGAGATCAGGCGCAGCGGCCTACGGCGGAGCTCTGGGTGCGGCGCAGCGCTACGCCGTGG	NA
		IG100024489	0	0	0/1	0.144578	NA	4.06	TGCAGTATTCGAAATCAGACTGTGCGAGGGGTACAAAGACACCG	NA
		IG100310765	A01	66780251	0/1	0.144578	NA	4.06	TGCAGCCGCCGCCGCCGTCATCTTACTTGTCATACTGACCGCCG	NA
		IG100013579	A01	66844755	0/1	0.144578	NA	4.06	TGCAGTCATCAATATGCACTATCTATCAGCTAGGAGAGGTGGTGGCATCGAGGCTCGAGGGAGCTTGGC	NA
		IG100024536	B06	104716285	0/1	0.144578	NA	4.06	TGCAGTCACGAAAGAATCTCTCTGCCGTCCTGCTACTCGTCGTCTTGGCTGCTGCCG	NA
		IG100210051|F|0-59:T>C-59:T>C	A02	121756268	T/C	0.15	NA	4.06	TGCAGCCGCAACCGTAGGCGAAGGTCATCGCCTCCAGGAGCTCCATCGCCGTCCGCTGATGAAGCAAGC	NA
		IG100271956|F|0-55:T>C-55:T>C	A04	3244575	T/C	0.14	NA	4.03	TGCAGGGGGTCCCCACTGACCAAGCTGACGTTGGTAAACTTGCTGGTGTCGGCGTTGACGATGTACCCC	NA
	IL	IG100285512|F|0-18:G>A-18:G>A	0	0	G/A	0.13	NA	5.06	TGCAGCATCTCCTGCGGCGGACCG	NA
		D23623369	A01	185508811	0/1	0.12	NA	4.76	TGCAGTGGGGAGCGACACGCTGATTGGGTCGAGAAGGAGCGGATCCGCAAGGGGAAGATGCCG	NA
		IG100028456	B05	96858544	0/1	0.313253	NA	4.47	TGCAGATTCTTCGATTCATGGCATGGAAACACAAAAGTTCTTCGATTATTGGCATGGCCG	NA
		IG100325480	B06	13765360	0/1	0.31	NA	4.42	GGGCCACCTGCACGCGCCTCACGTGGCGCCTGCGTTGTTTCAACCTCCACCACATCGCCAAGGACTGCA	3-oxoacyl-[acyl-carrier-protein] synthase I, chloroplastic-like [Setaria viridis]
		IG100227628|F|0-63:T>A-63:T>A	0	20922903	T/A	0.43	NA	4.27	TGCAGTTTCTCCTCCCTAATTCGAAGGCCATGGCCAGTCGGCCACCAATCCACCAGCAGCACTTCAGCG	NA
		D23597667	B04	41516337	0/1	0.14	NA	4.22	CGGGGGAACAGGCAATTAGGTGTTGGAACAAATTGACCAGCTGTTTGTCATTCTCTTACCTGCA	geraniol 8-hydroxylase [Setaria italica]
		D23588624	B05	12063272	0/1	0.17	NA	4.19	TGCAGAAGACGCCGCGGACGCGGTCAGGATGCTTCGTTGATTCCCTCAAACTCCAAGCCACAGATCTGC	Serine/threonine-protein kinase SMG1 [Hordeum vulgare]
		IG100247418|F|0-8:C>G-8:C>G	0	0	C/G	0.2	NA	4.19	TGCAGCGGCGATACGGATTCAGTTGTCCCG	NA
		IG100034638	0	0	0/1	0.23	NA	4.19	TGCAGCATCTGCCGCAATTTTCCATGCTGAGTGAGGATCATATCGAGAAACGTTTGGATCTGCGATGCA	NA
		IG100339862	B05	9736642	0/1	0.24	1.32e-10	4.15	TGCAGCGGGGAGCAGGAGGTGAAGGCCCCATCGGGTGATATCCG	Cysteine-type peptidase [Zea mays]
		IG100183676	B02	74385472	0/1	0.168675	NA	4.09	CGGTTCCACCAATGAACCAATGATGAAAATCATCACTGCA	NA
		IG100037355	B01	184708060	0/1	0.13	NA	4.09	TGCAGACTGCAACGGGTATGGAGGATTTTCGTTACCTGTTCCTGGACACCATTGATTGGTCTGCGGTAG	NA
		IG100117325|F|0-31:G>C-31:G>C	A01	164907029	G/C	0.11	NA	4.03	TGCAGGTAGTCTTGGCCTTCATAGGAAAGATGGTTGCGGGTGGTGGTGTTAAGTTCCCACCG	NA
		D23623383	B01	13576244	0/1	0.24	NA	4	ACGAATTAGGGCCTGCAATGTGATTGGGACCTGAATTGTTGTTTTTGTTTCGCTTGGTATTACGCTGCA	Auxin-independent growth promoter-like protein, mRNA [Zea mays]
	ST	IG100364702	A01	47925751	0/1	0.36	2.61e-07	2.99	TGCAGCCGCGGCCAGAGCGGCGATGAGGATGAACGCCGTCGTCTTGTCAATCGACTGCGAAGGAGATGC	cysteine-rich repeat secretory protein 38-like [Setaria italica]
		IG100222406|F|0-19:T>C-19:T>C	B01	2510203	T/C	0.23	NA	3.18	AGACGCGTCCGAGATGTACGTCTGGACGCAGCTCACGCGGCATGAGTCTATGAGGTGCCGTAACCTGCA	ankyrin repeat-containing protein NPR4-like
		IG100258355	A02	133264994	0/1	0.39	NA	3.16	AAGTAAAATAAGAATCCGCACTATGGCATTTTTTCTAGGATACACCATTTTGCATGGATATATTCTGCA	retrotransposon protein, putative, Ty1-copia subclass [Oryza sativa Japonica Group]
		IG100222553|F|0-48:C>T-48:C>T	B02	17106838	C/T	0.18	7.66e-10	2.52	TGCAGGTTCTCGAGCTGTAGCGCTCTCTACCGATCTCTGTTCTGTTATCTCTTCTGCTGTGCAGCTTAG	NA
		IG100007430	B03	27169784	0/1	0.1	9.96282e-12	7.26	TGCAGCGTTTGTGCGGCGGACGGACTGAGATTGGACAGAGGAGCAGAGCAACGGGGGCGGCGGCACCGC	NA
		IG100033657	A07	32463945	0/1	0.47	5.49e-12	2.52	TGGTGTGGTGATTGCAAAAATGGAGGGAGTGAAACGAATGTTCGGTGCTGGATACTTACTTGGTCTGCA	NA
		D23546157	B04	40618761	0/1	0.13	NA	4.83	TGCAGATCAGCACATCGCCAGTCGTCGTTATTCGTAAGAACCACATGAACAGACAAGATCGTCATCTCA	receptor-like serine/threonine-protein kinase SD1-8 [Setaria viridis]
		IG100176232	0	0	0/1	0.240964	NA	6.83	TGCAGATTGGAGGCGGCACCCCG	NA
		IG100009472	B06	27110402	0/1	0.349398	NA	5.87	TGCAGGACTGTTCGTTCCGCCGCCGCCCGATCCCATCGGACGGCCACCATCTAACACGTATGTGGGCCC	NA
		IG100002741	A01	190248750	0/1	0.08	NA	5.75	TGCAGAGTGCAAGGCTTGTCTTGAGGATATACTTGGAATGTTGCTGTTTCTTTCTGATGAGCAGCAGAC	retrotransposon protein, putative, unclassified [Oryza sativa Japonica Group]
		IG100289793	A04	55178281	0/1	0.08	NA	5.75	CGGACATGGACTCCAGCTTCGGCTGAGAAACTGCA	NA
		IG100001021	A05	94117035	0/1	0.08	NA	5.75	GTTATCTCGAGTCAGTTTCACAGTTGCACGAACATAGCTGCTTGACTAGTATCTGCATTGTATTCTGCA	putative laccase-9 [Setaria italica]
		IG100265714	B04	89420596	0/1	0.08	NA	5.75	GAGGCCATGACCCCACACACCACCCGCCTCGCCCACTGCCCTAGCCTCACAAGTGGAGTCCGCCCTGCA	NA
		IG100004319	A07	12472529	0/1	0.0843373	NA	5.75	TGCAGGAATCTCATGGATGCTCAGCTCGTTGGAAGTTTCTGGCTGAGCCGCGGCCTCCAGAGCTTTAGT	NA
		IG100344227|F|0-9:C>T-9:C>T	A04	111442641	C/T	0.09	NA	5.45	TGCAGCTGCCCGAGGGGCTTCCGCCAGCGGCGGCCGCTCGAGTGGCGGCGAGACGACTACACGTCGGGC	G-type lectin S-receptor-like serine/threonine-protein kinase At2g19130 [Panicum hallii]
		IG100258820	A07	97648950	0/1	0.19	NA	5.26	TGTCCGATTGTGTCTGATCGTTGCGTCTTTCTGTCCTATTCCAATCTTGGCAGTAACCCTCGGACTGCA	NA
		IG100005399	A05	104295271	0/1	0.14	NA	5.17	GAGCAAACGTTTCAGCGCATCCTCTCCAAGGGATAAACCAGCTACAGAGCAGCGCGTGGCGATGCTGCA	NA
		IG100017625	A07	65121265	0/1	0.192771	NA	5.16	TGCAGATCGATCGATGCGCGCGGCGGGTTTCCTTACCG	homeobox protein knotted-1-like 1 [Panicum hallii]
		IG100033419	B02	5614742	0/1	0.313253	NA	4.93	CGGGCAATACAACAGTGTGGCTTCTGTGTTTGGATCGATCGGGCGCCTGCA	NA
		IG100362174|F|0-11:G>A-11:G>A	B01	154465091	G/A	0.12	NA	4.93	CCTCCTCGTCTTCGCGCTCGCCGTCGCCACCGCGCAGCTCGGATTCCTCGAGAAGCTCACCTTCCTGCA	probable ascorbate-specific transmembrane electron transporter 2 [Panicum hallii]
		IG100201249	A01	76096523	0/1	0.06	NA	4.9	TGCAGAATCTCAATCTCAGACTAACATGGGCCCTGCTACTTGCAGTAAAGTTCAAAAAGGCTAAGCACA	transmembrane protein 87B [Setaria viridis]
		IG100244061	0	0	0/1	0.421687	NA	4.84	TGCAGAAGTGACCAAGTGGTCAAATACCACACCCG	NA
		IG100030741	0	0	0/1	0.313253	NA	4.75	TGCAGCCTAAGAGCAAGTAGTGGCAGCTGCGGGCGGAGGAGGAAGAAGATGCAAGGTTGTTGTTGGAGA	NA
		IG100182701|F|0-35:C>T-35:C>T	B06	51200968	C/T	0.07	NA	4.74	TGCAGGTGCGGGGTGAGAGGCTGAGAGCAACGAGTCGGACCG	NA
		IG100267481	A01	188218444	0/1	0.1	NA	4.59	TGCAGCTGACAACTGATGAAGTGGCCACAATCTGTTTTATGTGACATTGCAGAGAGTATGGTAGTATCT	NA
		IG100212793|F|0-21:T>A-21:T>A	A07	43844422	T/A	0.14	NA	4.56	TGCAGCGTGTACAAGTATGTGTGAAACGAAGCCTGGGACCACAGGCTGTTGTACCAGTAGTGTATTTTT	NA
		IG100288067|F|0-13:G>A-13:G>A	A01	185155242	G/A	0.16	NA	4.56	TGCAGGCGGCGAGGGCGTAGACGCGATCCG	NA
		IG100331302	B01	146280679	0/1	0.493976	NA	4.47	TGCAGATGGTGGTGATGAGCAGCACGGCGACGAGGCGCGCCTCGCAGAGGAGCGCGCCCTCCG	cation/H(+) antiporter 15-like [Setaria viridis]
		IG100092498|F|0-14:A>C-14:A>C	B04	33032404	A/C	0.19	NA	4.47	TGCAGAATGGACACACCATGGATGCATCGCTTTCAGATCTGGTCACTGAAAGGACATAAACAGATTTTT	NA
		IG100123166	B01	124856971	0/1	0.433735	NA	4.46	TGCAGTGGAGCTTTAATTAAGAGATGTACGCAACAGATTATCTGCTCAATGTTGACTAGTTTTCCAGGC	NA
		IG100230184	A05	115829717	0/1	0.24	NA	4.46	TGCAGGCGGCTCTGGCGATGGTGGGTGGTCCTGTAGGCGGCGGCGAGAGGTGCAGGAACGACATGTGGG	NA
		IG100028199	A06	38964952	0/1	0.24	NA	4.46	TGCAGTTTTTATCGGGCATCGCCAAAGTGCTGCATCAGCTTTGGCTTTGCAGGCCATCAGTACTTGGCC	NA
		D23589555|F|0-26:T>C-26:T>C	B07	10182821	T/C	0.46	NA	4.42	AGACTTGGAGAGAGATGCATGCTCTCGATGATGATGATTGGCAGTTAGCCTAACTACATATGATCTGCA	NA
		IG100202450	B02	80180478	0/1	0.12	NA	4.27	CTGACCAGGTCCCTTTGCGCTGTTGGAGCACTCTGGGAATGGAGGGACATCAGTGGACTGAAGTCTGCA	cation/H(+) antiporter 15 [Setaria italica]
		IG100215545|F|0-54:A>T-54:A>T	B01	144128814	A/T	0.37	NA	4.26	AGGTTTGCACGGGCTGGGGCGCGGTCGTCCTCTTCAGTCGTCGGTCGTCAGTCGTGGCGCCAAGCTGCA	NA
		IG100225826|F|0-67:G>C-67:G>C	B03	29628501	G/C	0.49	NA	4.23	TGCAGTGGAACACCATACACCAAATACCAAATGCTATAACGCCATTAGGATCTAACATAAATGTTCTGC	NA
		IG100000697	B02	170471983	0/1	0.07	NA	4.22	TAAAAAAAGGGAAATAATACTAGGAACTGGAATATTTTTTTCCTTCGACGTTTTAGGTTCAGTTCTGCA	NA
		IG100106883	B03	3549632	0/1	0.337349	NA	4.16	TGCAGCGTTGCTTTTTTGAGGGTGCCCCAAGGAGAGAGAGCAGTTAAGTCTGGGCGCTTCACGCTGGAC	NA
		IG100039086	A01	168578123	0/1	0.45	NA	4.11	TGCAGCAATTGTTCCTCCGCAGAAACAAACCTAGAATACGCCGTGAATCTCCATTCTCTGCTCCCAGGT	NA
		IG100300657|F|0-33:C>T-33:C>T	B01	116199429	C/T	0.19	NA	4.08	TGCAGGAGTTATAAGAGGAGTCTCACGACTTCACGAGACGCTCCACACAAAAGCAGAATTGCTGCTTCT	NA
		IG100360284|F|0-46:G>A-46:G>A	A05	33564972	G/A	0.07	NA	4.08	TGCAGTGCGCGAAGAAGCCATCCTGATATCCCTTTCGTGCTTCCCCGTCCCAGTAGTTTAGGATTTCCT	NA
		IG100238092	A05	86924334	0/1	0.301205	NA	4.06	TGCAGCCGCATCCGCATCCGCATCCAGTCCCAGTGTCTTGTCAGCATAGATGTCGGGCCCTGTGACTGT	NA
		D23560848	0	0	0/1	0.12	NA	4.02	TGCAGGGGTGGATTTGCATGCGGAGAGCCAAGCTTGATACGCACACCAGGCAAGCAAACTAAGGTTCTT	NA
	TDW	IG100357264	A01	41507129	0/1	0.41	NA	5.5	TGCAGTTACTACCGTCATTAGAGCAAATGGACGGAGGAGACGGCGCAGATTAATGATGGGCCGAGAAAG	NA
		IG100244061	0	0	0/1	0.421687	NA	5.16	TGCAGAAGTGACCAAGTGGTCAAATACCACACCCG	NA
		IG100035697	A05	98061537	0/1	0.493976	NA	5.03	TGCAGAGGAGAGTCGAGACGTCTAGTTTTTGTTCTAACTTGCCG	Transcription factor bHLH82 [Dichanthelium oligosanthes]
		IG100125122	B04	106625607	0/1	0.409639	NA	4.81	GCGAGCTTTGAGCTTCCAGTTGCTGAGACGCTCGTATGCGACATCGCAGCAGCAGCAGCAGCAACTGCA	NA
		IG100123166	B01	124856971	0/1	0.433735	NA	4.81	TGCAGTGGAGCTTTAATTAAGAGATGTACGCAACAGATTATCTGCTCAATGTTGACTAGTTTTCCAGGC	NA
		IG100299277	B02	12603060	0/1	0.39759	NA	4.55	TGCAGCTGCTACATGTCGTCCTGTCAATGCCCAGTGCTCTATTCTGCGTATGGAGACGGCAGCCTCGTA	NA
		IG100220533	B04	109152986	0/1	0.457831	NA	4.52	TGCAGGGGCCACTCCTTTGTCCTGCCAGCTGTGGCTGTTGTTAAAGGACAAACTAACAACCAACACCGA	NA
		IG100261294|F|0-47:G>A-47:G>A	A05	6373546	G/A	0.43	NA	4.52	TGCAGATTCATCAGGTACTCCGATCCTCAGCTTCTGCTGACGAAGCTGCGTTTCCTCGTGTTCCCGCTC	NA
		IG100310520	A02	29786794	0/1	0.23	NA	4.44	TGCAGCATCAGGTCAAGATAGGCGCGGCAGCCGCCGTCCG	NA
		IG18144352|F|0-43:C>T-43:C>T	B03	72570312	C/T	0.15	NA	4.38	TGCAGGGGTACATCAAGAGGATGAAGAAGCTCAGCAAGATGTTCGACCG	trimethyltridecatetraene synthase-like [Setaria viridis]
		IG100012688	B01	37868340	0/1	0.337349	NA	4.32	TGCAGGTTCTGGCGAGGGAGCCTGGATCCCGCGCCCAATCCGTTGAGCTTCAGGTCGGCGCTGAACTGC	serine/threonine-protein kinase HT1 [Setaria italica]
		IG100304862	A05	10363168	0/1	0.23	NA	4.21	CATGGAAAGACTCACCGTGCTGCTTCTTCCAGCTCCTCCAGTGCTCCCACCAGCCACAATCGCACTGCA	homeobox-leucine zipper protein ROC6-like [Setaria viridis]
		IG100021803	0	0	0/1	0.493976	NA	4.2	TGCAGGAGAATCTGAGCACGTGCCAAAATTGACAGAGGTCGTGGGCTCGTGGCCG	NA
		IG100264168	B01	17551628	0/1	0.45	NA	4.08	TGCAGCCCAACGTTGTTTATAGAGTGGAAATTTCTGGAGGAACCCTGAAATGTTGATTTAGAGGACAAT	NA
		IG100293585	B01	1757903	0/1	0.325301	NA	4.07	TGCAGAGACTACAGAGTAGGAACACCAAATCCCGACCTGGAAAGAGTAGAGATCGATCTCCCG	NA
		IG8170757|F|0-17:C>G-17:C>G	B02	176171258	C/G	0.3	NA	4.07	CGGTGCAGGCTGTGCGGCGCTTGTGCGCCTGGACGCAGGGGAGGCTGCA	putative box C/D snoRNA protein SPCC613.07 [Setaria viridis]
		IG100042453	B02	11815163	0/1	0.48	NA	4	GGTTTTGTTCTCTGAAAGATCTAGGAAGATGGAATGGTAGACAGCATATATTTGTAGCCTTTCTCTGCA	Carboxyl-terminal proteinase [Zea mays]
DS-MWS	PH	D23576564	B01	179072922	0/1	0.11	2.22355e-09	4.6	CGGCGGCCACGGACCCCGCCGCCCACTCGAGCGCCGCACGAAGCCCGTGTACAGCTGCA	antifreeze protein Maxi-like [Panicum miliaceum]
MWS		IG100244029	A07	42941985	0/1	0.24	7.80195e-07	5.68	TGCAGAAGGAAGAAGCTCAACAACTGGCTACTGCTCAAGCGAACCCCG	NA
MWS		IG100231586	B05	8456120	0/1	0.49	NA	5.51	CCGTGCCACGACCAGGACAACAGCGTGAATTGCCGCGGTGCTTGCTGCGAAGTACTCGTCGAGGCTGCA	NA
MWS		IG9915095	0	0	0/1	0.43	NA	5.24	TGCAGGCACATCCGCATCTGAGCGAGCCG	NA
MWS		IG100272979	B06	27943099	0/1	0.31	NA	5.19	TGCAGGTGCTGCCGCCGCACTTTAGCTCGCCGCCATCGTGTCGTGCACCTCGCAGCCGCAGCCGCGCCG	NA
MWS		IG100279466	B03	26215935	0/1	0.48	NA	5.17	TGCAGAGATGGATCCACGACAACATATACGTGCCACGGACGGCTTCCTGGTGCCGCGGTGCTGCTTCTG	NA
MWS		IG100029637	A07	6604223	0/1	0.45	NA	5.16	TCAGATCATCCACCAGGCCCCGCATCCACTCGGCATCGGCATCGGCGTCGGCGTCGCCTGGAGGCTGCA	NA
MWS		IG100005509	0	61766094	0/1	0.29	NA	5.12	TGCAGCATGGAGTATTCCTGAGTCCTGACCATTTCTGTCAATTTTTTCAACCACTAGAGTCATTTCTGT	NA
MWS		IG100218301	A02	46585403	0/1	0.22	NA	5.08	GAACAAACTAGTGTTTTCAGATTGGATCTCCGAATAAGAACAACACCTCCTCTCCCAACGTGGCCTGCA	NA
MWS		IG100350313|F|0-46:A>C-46:A>C	A03	141026276	A/C	0.45	NA	5.07	TGATGACCTGCGGGTCGTTCCTTACGGGGAGCGAGGCGGACACGCCGACGCCGCAGAGCGAATGCTGCA	palladin [Brachypodium distachyon]
MWS		IG100011066	B01	24243211	0/1	0.46	NA	5.04	CCGCGGCTTGGGAGTGGTTGCAGCGGGGTGTTCGTGTTCCAGGGCGGGTGGCGAGCCGCCAAGCCTGCA	NA
MWS		IG100005012	A03	69739528	0/1	0.46	NA	4.91	TGCAGCAGCTGCTTCTTATTCGGGTCTGTTTGTCTGCATTTTGGATGCATGCAATTGTCTTGTTCCTCA	Protein UPSTREAM OF FLC [Zea mays]
MWS		IG100263749|F|0-32:G>T-32:G>T	A03	54438608	G/T	0.36	NA	4.91	GCAGGAGAATGAAGATGGCGGCCGCGGATTGGTTGGCGTAGGAGCAAGTCATTATCATATTTGGCTGCA	NA
MWS		IG100285230	B07	30083217	0/1	0.46	NA	4.85	TGCAGCAGCTGCGCTCGCCGCGGGCGACCAAACAGGAAAAAACTCGACCCG	NA
MWS		IG100366072	A07	74411726	0/1	0.2	NA	4.71	CATCGCAGATGCAAAAACATAGCTCTCAATGATATGCGGACCTAACCATTTACTGCATCTTCACCTGCA	DNA polymerase delta catalytic subunit [Setaria italica]
MWS		IG100271352	A06	70254636	0/1	0.27	NA	4.7	TGCAGGGAAAAAAACTGTAAAAGTGAACTCCAGTTCGCTTTGGCGTCCAGTTCAGGTCGCCG	growth-regulating factor 1 isoform X2 [Setaria italica]
MWS		IG100116574	B02	132263630	0/1	0.28	NA	4.69	TGCGTGCATGATAACGTGTTAAGGCTGGTCGCACTGGGTACTGGGTGGGCAACGGGACGGACCCCTGCA	NA
MWS		IG100225198	A01	82398457	0/2	0.14	NA	4.64	ATGCTGGGTAGATTGTGGTGATTAATTCGAGCAGAGGTGGCGGGCTGGTACCCTGGCCGACTCACTGCA	NA
MWS		IG100351342|F|0-22:C>T-22:C>T	B01	9344783	C/T	0.17	NA	4.63	CCCGAAAATCTGCCACTGAAGTGTCAAATGTCCCCCTTATATGCTGGCACATCACCATCAGGTCCTGCA	DNA-directed RNA polymerases I and III subunit RPAC2-like [Panicum hallii]
MWS		D23564115	0	0	0/1	0.24	NA	4.49	TGCAGAGGTTGATCGAGCCTGGCGAGGGCGGAGATATCGACGCGAGAATTTACAGGACGCCG	NA
MWS		D100208279	B02	104171270	0/1	0.14	NA	4.46	TGCAGGATCAGCGGCTGAAACTTGGCCGCCGCCGCCGCCTCCTCGGAAGGCTCCTCACGCCCCCTCTTC	histone-lysine N-methyltransferase, H3 lysine-9 specific SUVH4-like [Setaria viridis]
MWS		IG100330700	A01	195913593	0/1	0.49	NA	4.4	TGCAGCTGGGAAGAAGCTGAGGGAGATAGGATCGTCTTCTTCCCCACCACCCGAACTGTCAAAGGATAC	cytochrome P450 90A4 [Setaria italica]
MWS		IG9965547|F|0-25:G>T-25:G>T	A03	63901429	G/T	0.41	NA	4.37	TGCAGCCCTTGGACACGCTGCCCTCGCCGCCCGCCGTCACGGACGACAGGAACGAGGTCGACGTCGCGG	putative WRKY transcription factor 17 [Panicum miliaceum]
MWS		D23611734	B02	169600934	0/1	0.07	NA	4.34	TTTAGGTCATCGTGTATTCGTGTGTCTTGTTGCTTTCAGTGCTGCTAGTAGTGACTCCGACGGGCTGCA	NA
MWS		D30285765	A05	91759009	0/1	0.07	NA	4.34	TGCAGCAGCCTACCGCCCTTTCTTTTGGCAGTAGGTGCATTGTAACGCTACTACCACTGTTTGAAACGC	NA
MWS		IG100042448	B02	135748957	0/1	0.35	NA	4.34	TGCAGACTCGTCTCTACTACTCTATAAATGTGTCCTTTGAGGCTGGTAATGAACTCGCGCGAACCAAAT	NA
MWS		IG100003500	A07	64113866	0/1	0.27	NA	4.29	TGCAGATGGGAGAGATCCCAAACTTGCGGTTGCGGCGACAGGTTTTCCATGTTGACTTTGGAAATGCGC	NA
MWS		IG100191099	A01	33239534	0/1	0.49	NA	4.24	TGCAGATAAAACGGGACGTGGGGGATCGTGCAAAAAAATACCG	NA
MWS		IG100010830	0	0	0/1	0.39	NA	4.21	TGCAGGCTACGTACGGATGTACGTACAGCGGCAAGAAACATTTTGATCCAAAAGCATTACGATGGGCCT	NA
MWS		IG100258735	A02	15552987	0/1	0.45	NA	4.2	TGCAGACCAATTTCCCAAGTAAAAATCTGCCAAGGTTTACTGCATAAAAAGTTCGTTAAGAAACCTTTT	NA
MWS		IG100210695|F|0-24:T>A-24:T>A	A04	17114111	T/A	0.35	NA	4.2	AGCATCACGTCGATCAGTGATCAGAGGATTCGCAGAAGCTACAGAGTACTTACGACTTCTCAGGCTGCA	NA
MWS		IG100013558	B01	26190179	0/1	0.4	NA	4.18	TGCAGTCAGTAATATGATAGCTGAAAAGCCTGAAATGAGGTGTGAATCATGGGATGCAGGTTGCGGGGA	NA
MWS		IG100343258	A04	53056083	0/1	0.42	NA	4.18	TGCAGCCACGCCGACCCACTGTTCAACGACCTCACTGTCGACGGGCTTATCGGCCTCGGCGACGGCGCG	NA
MWS		IG9896147|F|0-6:C>A-6:C>A	B07	31442243	C/A	0.28	NA	4.14	TGCAGCCAGTACGGCTACTGCGGCACCACCAGCGAATACTGCGGCGCAGGGTGCCAGTCGGGCCCGTGC	class IV chitinase 4-4 [Pseudotsuga menziesii]
MWS		IG100013289	B05	7839075	0/1	0.2	NA	4.14	TGCAGTAGTCGTCAGTGTTGTTACCACATCAGGAAATATCACCCGCCGCACATGCGCGTAAACTCGCCG	NA
MWS		IG100285400|F|0-22:T>C-22:T>C	A07	14234026	T/C	0.37	NA	4.12	TGCAGCAGGCCCCCGCGGGCGGTGACGCGGAGCCCTGCTCGCTTGACAACACCG	WRKY transcription factor WRKY24 isoform X1 [Setaria italica]
MWS		IG100175009|F|0-30:C>G-30:C>G	A04	36258807	C/G	0.47	NA	4.09	TGCAGACGACAATCTCGGCGAGAACGCGTGCCCCCCACCG	NA
MWS		IG100029776	B05	3106532	0/1	0.48	NA	4.09	TGCAGTAATCGGCTTTTTATTTCTAGGAGCAAAATAAATTAAGCTGCTCGTCTTTGTCTGCGTGATCCA	NA
MWS		IG100126968	A03	12069012	0/1	0.31	NA	4.06	TAACTCTTGGTGAGTAGTAAATTTCATTCACAAAATAACTAGCATGACAGGACAGCTTCTCTATCTGCA	probable inactive purple acid phosphatase 1 [Setaria viridis]
MWS		D23605138	B06	74375793	0/1	0.4	NA	4.06	CGGGATCAGCGGATGCGGCTGTCACAAGACTCCATGTCCGCTGCA	NA
MWS		IG100149742	B04	111540646	0/1	0.37	NA	4.05	TGCAGTTTGACAAGTCCTCACATACTGAACAAGCAAGGCATGATAGCCATGGCAATGAGAAGCTCGGCA	NA
MWS		IG100043236	B05	8165718	0/1	0.45	NA	4.03	TGCAGATCGTGCATGTACATATTTCGCGCAACAGTTTCTGGCCG	NA
MWS		IG100029813	A07	4359235	0/1	0.23	NA	4.03	TGCAGTTATATTATATATATAGTCCCATGCTTAGCCATTCAAAATGTTCTACGAGTTATAGCAACACGT	NA
MWS		IG100109903|F|0-41:C>T-41:C>T	B04	95595897	C/T	0.46	NA	4.03	TGCAGCTTCAGCGCGTGCCCCAACGAGGCCGTCGCGTAGTTCGCCGCCTGCATTGCAGAACACACCCAC	NA
MWS		IG18083490|F|0-40:G>C-40:G>C	A04	26045912	G/C	0.49	NA	4.01	TGCAGATGCCTACAATTCAGCTTGATGGAATTTTGGTGGAGTTGAGAAATTTCAGGAAGGTCCAGCGTG	NA
MWS		IG18165666	B01	143965720	0/1	0.22	NA	4.01	TGCAGCAACGGCGACATCTTCAGGTGGGAGCAGCTGTGGCCGATCCTCGCCGAGCGGTTCGGGCTGGAG	3-oxo-Delta(4,5)-steroid 5-beta-reductase-like [Panicum hallii]
MWS	LW	IG100337563	A01	179359778	0/1	0.35	9.52245e-19	3.97	TGCAGTTGTTCCAAGTTACAACACCAGTTAAGGCTAACACACACCAATCTACTTGATGGCAATTCTACG	putative E3 ubiquitin-protein ligase SINA-like 6 [Panicum hallii]
MWS		D23620515	B02	149271902	0/1	0.4	6.08194e-09	NA	CGGCGTGTGCCTTCGCCGCGTCGAGTTTGGGGGGATTCTGCA	NA
MWS		D30269906	B04	20263461	0/1	0.18	8.63659e-08	3.15	TCAAGCTTCACGTTCAGTAGCAGCGTACACCAAAAATCCAAAATTCTGATCTCGAGTCCGTGCACTGCA	glutamate decarboxylase 1 [Setaria italica]
MWS		IG100090266|F|0-6:C>G-6:C>G	A01	87787617	C/G	0.43	NA	5.28	TGCAGCCTGCCTAACTACGCGACAAATTCCGATGAAATCTCAAGTTCCCAACTACTGTCCATAACTTCC	NA
MWS		D23564115	0	0	0/1	0.24	NA	4.35	TGCAGAGGTTGATCGAGCCTGGCGAGGGCGGAGATATCGACGCGAGAATTTACAGGACGCCG	NA
MWS		IG100007430	B03	27169784	0/1	0.1	NA	4.2	TGCAGCGTTTGTGCGGCGGACGGACTGAGATTGGACAGAGGAGCAGAGCAACGGGGGCGGCGGCACCGC	NA
MWS		D23639427	B05	16323223	0/1	0.25	NA	4.19	TGCAGGTGAGGGACAGCATGCAGCTTCACGTCGCGATCGCCTACTCCTGGAACGTGCTCGTGTCGAAGC	polygalacturonase [Setaria italica]
MWS		IG100092244	B02	141889888	0/1	0.06	NA	4.18	GGGCAATGGCGGCGCGGTGATCGGCGGACGGAATGCTCGGCGGCCTGGTTCGGGAGGGGTTATTCTGCA	NA
MWS		D23576564	B01	179072922	0/1	0.11	NA	4.13	CGGCGGCCACGGACCCCGCCGCCCACTCGAGCGCCGCACGAAGCCCGTGTACAGCTGCA	NA
MWS		D23639553|F|0-28:C>T-28:C>T	A07	4201911	C/T	0.24	NA	4.07	CTCGGAGGAGCTCTCGAAAATGCTAATGGAAGTGGCCGACGGGTACAGTTGAGCATTTGCCACACTGCA	probable esterase PIR7A isoform X2 [Setaria italica]
MWS		IG100202450	B02	80180478	0/1	0.12	NA	4.04	CTGACCAGGTCCCTTTGCGCTGTTGGAGCACTCTGGGAATGGAGGGACATCAGTGGACTGAAGTCTGCA	cation/H(+) antiporter 15 [Setaria italica]
MWS		IG100149375	A06	43916904	0/1	0.34	NA	4.01	TGCAGGTACCCAGTATCACGCGAGTGATGTGTAATTGAGGTCTCCAATCTCTACTCCTAAAAAGCCCGT	NA
MWS		D23628817	0	0	0/1	0.19	NA	4	TGCAGCAGGCGGTTGTTGGCCG	NA
MWS	TN	IG100224631	A01	43011334	0/1	0.08	1.49301e-06	4.94	TGCAGTCGGCACCTCACGAGGTCGCTGAAAAGCTCCTGCTCCGTGCCGCCGTCGAGGTAGAAGTTGACG	xylanase inhibitor protein 1 [Setaria italica]
MWS		IG100008828	A01	67451249	0/1	0.18	4.37076e-12	6.42	TGCAGCTTCTGCGCTGACGACGAGGTGGTGGCGCCCGAAGCGTTCGAACCAACCGTGGTCCGTACACCG	protein WVD2-like 5 isoform X1 [Setaria viridis]
MWS		IG100252208	A01	78125692	0/1	0.07	5.15343e-11	4.94	TGCAGCCACTCAGGTAACAATAATGCAGCATTTCTATTCACAGATGCCAATATTAAGCCCG	NA
MWS		D30280678|F|0-13:T>A-13:T>A	B02	134648841	T/A	0.06	1.73359e-06	NA	CGGTGAACTACATCTTTTTTTATGTTCCTCCTGCA	hypothetical protein SETIT_5G264200v2 [Setaria italica]
MWS		D23602332|F|0-27:A>G-27:A>G	A04	144711215	A/G	0.26	3.17032e-08	3.65	TGCAGGATGCTCCATCAGGCCGTAGTTACCG	NA
MWS		IG100276656|F|0-50:C>T-50:C>T	A07	65279888	C/T	0.25	NA	6.96	TGCAGTTTATATGCAGATAAGGTGTGAGCACAAAAGGGCAAAAATGAAGCCGAACAATGGATCTTCTGC	Transcription factor bHLH110 [Zea mays]
MWS		IG100209381|F|0-14:T>A-14:T>A	A01	67451184	T/A	0.21	NA	6.64	ACCAACCACCAGGAAGCGAGGAGGAAGACGGTCTCTGCCGATCGAGCTGCATGCAGGCTGCTGGCTGCA	L10-interacting MYB domain-containing protein-like [Setaria italica]
MWS		IG100135877	A01	67451249	0/1	0.06	NA	6.23	TGCAGCTTCTGCTGACGACGAGGTGGCGCCCGAAACGTTCGAACCAACCGTGGTCCGTACACCGCCACC	putative nuclease HARBI1 isoform X1 [Setaria viridis]
MWS		IG18165199|F|0-33:A>G-33:A>G	B05	101808649	A/G	0.2	NA	4.86	CGGATCATCTTTGGGCTTTTTGGGGAGACGGTCCCTAAAACTGCA	NA
MWS		IG100007210	0	0	0/1	0.24	NA	4.84	TGCAGCGGCTCCAGAGGATGAATCCTCTATTTTTAAAGGTCCAGGTTAGGTAACCGTTGCGGATAGTGT	NA
MWS		IG100010782	A05	98057060	0/1	0.1	NA	4.77	TGCAGGCGTCCTATCCCGAAAATGATATTATTCTGGGTGCGGGAGCAGCTAGCCTCGGGATGGATGAGG	NA
MWS		IG100179901|F|0-27:G>A-27:G>A	B03	87968565	G/A	0.07	NA	4.68	CGGTGAGCCGCTCTTCCTTTCTTACCAGCAGCTGCA	NA
MWS		IG100026945	A02	50101801	0/1	0.06	NA	4.68	TGCAGCGTTCTTGCAGGGGGGCAATCATCGCCGCCCGTCCTCACATAAATGGCGGCGCCACTGCCCACC	NA
MWS		IG100010630	A03	13861066	0/1	0.06	NA	4.68	TGCAGGCGCAACTGGGCAGCTGGCTCGGAGACCTCCTCCCCCCCTCTGGGACACGTCCCATCCG	NA
MWS		IG100016197	A04	81344835	0/1	0.06	NA	4.68	TGCAGAAGAAGCTCGCCCCCATGGACAAGCAGAAGCTGTCGCCG	expansin-B16 isoform X1 [Setaria viridis]
MWS		IG100002977	A05	98170286	0/1	0.06	NA	4.68	TGCAGATATTCCCCCGCTGGAGGCGTGCGCAACCGCCGTCCCGCCGCCGTCCCGCTGTCATGCTGATCC	NA
MWS		IG100028141	A05	28279352	0/1	0.3	NA	4.61	TATTGCGCTCCTTCCACCATAACCAGAGGAGGCACATTACCTTCATTTGTTCGGCATCCTTCAACTGCA	retrotransposon protein, putative, unclassified [Oryza sativa Japonica Group]
MWS		IG100098595	0	0	0/1	0.46	NA	4.61	TGCAGCAAATTTCGAGACTCAGATTGCTAGCTCTAGCGTAGTTAAAACACACATTCGTCTGCTATCCGA	NA
MWS		IG100213596	A06	102389773	0/1	0.12	NA	4.54	CGCATATCAGTTTAAATCCTTGTGAAACACTGCACTGCGCATACTGCTTTCCTGTTTGCTGGAGCTGCA	NA
MWS		IG100206811|F|0-11:T>C-11:T>C	A05	42219748	T/C	0.06	NA	4.52	TGCAGCACCGATGACGATAACGCGGTGGCGAGCGGCGGCAAGACGGCACAGGCGGCGGGTGGAGGATCA	ethylene-responsive transcription factor TINY-like [Setaria viridis]
MWS		IG100263314|F|0-24:G>A-24:G>A	B01	183530606	G/A	0.07	NA	4.46	TGCAGCAGTTAATAAAAACAAAAGGCTGAAATATATAATGGAAACTAAGCATAATTTAGAGGCCCTTGG	NA
MWS		IG100021353	A01	32870274	0/1	0.11	NA	4.45	TGCAGCTTCCCGTCAACTTTGGGTGCGTTTGCGAGGAGTGCATCTCATACCTAATCAGCCG	NA
MWS		IG100009346	0	0	0/1	0.11	NA	4.43	TGCAGGACATCCATCAGGAGAAGCTTTCTTTCTGGCGCCAAGGTTCAACCTTCGTGTTGCGGCTGACTG	NA
MWS		IG100349546	A05	54068774	0/1	0.19	NA	4.41	TGCAGATAGAGTCGTTTTCGCTTCCTTATACTGAATGCGATGGCATCGCTTGCACGTTTGTGCACGGTG	NA
MWS		IG100230717|F|0-33:T>A-33:T>A	A02	30576207	T/A	0.14	NA	4.41	TGCAGTAGGCTCTTAGACAATGCTGTGTAGACCTGCTTGCCCTTTCTAGTTCTTGATAAGCTAGTTGCA	NA
MWS		IG100029702	A01	194732797	0/1	0.27	NA	4.36	TGCAGGACTCGAGGCTGTCAACAGAACAGAGTGTGATGATGGGGATGAATTGATGACGCAATCCAGGGA	NA
MWS		IG18164521|F|0-16:G>T-16:G>T	B02	82833375	G/T	0.13	NA	4.32	TGCAGCATGAGCGAGTGGTTGTACAGGCGGCTGCCCGTGCCG	NA
MWS		IG100368647|F|0-49:G>A-49:G>A	B04	95922679	G/A	0.13	NA	4.29	TGCAGTAATTTAGCGCGTTCTCAAAATTTTGCATAAGCACTTCAAAATCGGCCAATAAGAAAGTTGTTC	NA
MWS		IG100270587|F|0-19:C>A-19:C>A	A01	197457597	C/A	0.06	NA	4.26	TGCAGGCCGCGTGCACTCACATGAAGCAGAAAACGGGCCTAATCTATGTCGGCCATAGGCACAGTAACA	NA
MWS		IG100176349|F|0-9:G>A-9:G>A	A06	14166110	G/A	0.07	NA	4.26	CGGTGTTAACAGTAAATTTCTTTTTTACAGGTTCATCAGCGTTGCTGCA	NA
MWS		IG100187624	B03	20803361	0/1	0.07	NA	4.24	TGCAGCCAGGGGTGGAGACTCTACAGGACGCAAGCATGTACTATGGTGCATACCCG	NA
MWS		IG100093753|F|0-43:T>G-43:T>G	A01	194732764	T/G	0.05	NA	4.22	TGCAGACTCGAGGCTGTGTGCGTGGAGTAGCTAGCTGTCAACATAACAGAGTGTGATGATGGGGATGAA	NA
MWS		IG100097540	A01	25742480	0/1	0.22	NA	4.19	TGCAGATGGAGAAACACATCAATCAGACAAGGATATACCAGTTTGGAATAGAAAGTTTCCTACTTTGAT	NA
MWS		IG100030095	A01	178793990	0/1	0.11	NA	4.18	TGCAGGTCCGCCGCCGCCACCAAGTGCAGATCCGCCGTTCCCCAACCCTCCTCCTCTCATTTGCCGCCG	NA
MWS		IG100030014	A05	119987687	0/1	0.11	NA	4.18	TGCAGAGGCATTCTCCTTCATATCCTCCTCCAGTCACTTTTAAAGGCCCCCAATGTGGATGGTCTCAGG	NA
MWS		IG100010609	B06	68576560	0/1	0.19	NA	4.14	TGCAGGCGACGTCGAGCTAGCAGACCTCACCTGGACCTGGCTATGCCATTATGCCATGCCACGCCCCCC	NA
MWS		IG100094063|F|0-29:C>G-29:C>G	B02	122464078	C/G	0.16	NA	4.13	TGCAGAGAACCACTCGTTGGGATCAAGATCAATCAACACCAACACTTCATTGATTACTTTTGACAATTA	NA
MWS		IG100304417	B06	25507205	0/1	0.1	NA	4.08	TGCAGTCGCGCGCACATCCAAACTCTCGAGTCCCCTGCCTGTCTCGCGACCTCCGCTTCGGCTCAGCTC	NA
MWS		IG100022610	A03	74085222	0/1	0.1	NA	4.04	TGCAGGCGACAGGAAGCCTGGCAACACGTTTCTTTTCTGTTTAACGCGAGCGAACCG	NA
MWS		IG100346682	B02	164231756	0/1	0.08	NA	4.04	TGCAGTTTTACTGAGATAGTGAAATGGACCGAAGAAGGGAGTGGAGGAGGAATTGAAAAAAAAAGCCCA	NA
MWS		IG100008946	0	0	0/1	0.12	NA	4.03	TGCAGCTTGTGCGTGATTGTGACCAGTCTTCCTCGAGCAGATCGATAAAGACAACAGCAGGCCG	NA
MWS		IG100004922	B01	95804657	0/1	0.29	NA	4.02	TGCAGCAGCGATGGAATTCAAGGACCTCGTTCTCTCTGCGGTTCAGTGGTGATGGGCACACACACGTAC	NA
MWS		IG100029426	A03	7845015	0/1	0.11	NA	4.01	TGCAGTGCTTTTCCTTGTCTTTTTTGCGCTAGTTGAATCCCG	NA
MWS	PI	IG100289131	B07	31346608	0/1	0.22	NA	4.64	TGCAGTAGTATCGGAGAGCTGTTAATCCAACTTACGTCCG	NA
MWS		D23571388	0	0	0/1	0.17	NA	4.39	TGCAGTAAGAAGCTGACCAAGCTCGCCGACGAGCGCCTCCGTCGCAGGCTGGCCCTCCG	NA
MWS		D30272421	B07	47437344	0/1	0.18	NA	4.38	CTTCTTAGACTATCTCCAACAACACTTACCTAAATAGGAGACCCATTCGGGTATTTGGGTCTTGCTGCA	NA
MWS		IG100206942|F|0-42:G>A-42:G>A	B07	31177902	G/A	0.29	NA	4.18	TGCAGCACGATTGGGTTTAGCTGGTTTTCCCATCTGTAAAAGGAAAAAAAGGAAGGGATGAAGCAGATT	NA
MWS		IG100272006|F|0-13:C>T-13:C>T	A06	38690643	C/T	0.09	NA	4.1	TGCAGGGGTGTTGCGGGTACGGGCCAACCACGTGTATCTGCTGTCGGAGGCTGCCCGTGCGCACAAGGA	quinone oxidoreductase [Setaria viridis]
MWS	ST	IG100030775	A02	127590550	0/1	0.36	NA	4.55	TGCAGCCTTGTCCAGCATCAGCTCCTGGTCGAACACGGTCGTCCACTCTTTGTGCACAACGGACGCTAC	Leucine Rich Repeat family protein, expressed [Oryza sativa Japonica Group]
MWS		D23566649	0	0	0/1	0.19	NA	4.52	TGCAGCAGCACGCGTGGCTGCCACCCG	NA
MWS		D23617297	A02	147065958	0/1	0.11	NA	4.47	TGCAGCCAAGGGCAGCGCGACCTGGGGCCCTGCCG	NA
MWS		IG100126945	A01	31116557	0/1	0.47	NA	4.42	TGCAGATAATCTCAACTGGCCCGAGCAGCGCAGATTTATCTGCATTGCAAAGCTTAAACTGCTTGGAAT	putative protein phosphatase 2C 36 [Dichanthelium oligosanthes]
MWS		D23577750	A01	196705625	0/1	0.07	NA	4.36	GGGCTCCCGACAATCCGACCAACCACCAACCGCCGATGCCGCGGCGACCACGGAGACCACGCCGCTGCA	NDR1/HIN1-like protein 13 [Setaria viridis]
MWS		D100192469	B01	54458489	0/1	0.07	NA	4.36	TGCAGGGGCAGGGCTGATGGGGGTTGTCGGATCAGGTCGATGTGGACAGCCG	NA
MWS		D23626136	A03	148044953	0/1	0.07	NA	4.36	CGGGCGGCGGCGAGAGCGGGCAGTCGTGGAAGGACGGGTGCAGCTGCTGCTGCA	NDR1/HIN1-like protein 13 [Setaria italica]
MWS		D100009411	B04	8458736	0/1	0.07	NA	4.36	TGCAGGACGCCATGTGGAAGGTGTGTGTGATGAAGATCGATCGAGGGTCTCCTTGTGCTTGTGGAATCC	NA
MWS		D30268212	A07	12472529	0/1	0.07	NA	4.36	TGCAGCACAGCTTAAAAACGCTCAAATTAGCACAATACGTCGAACATGCATGTTTCGCTTCCTTGATTG	Nucleobase-ascorbate transporter 12 [Zea mays]
MWS		IG100028196	A01	31116674	0/1	0.49	NA	4.27	TGTGCCGACAGAGGGATTCCGAAGCCTTAAGCGACTGTGCTTTCAGGCTCCCAAACTTCCAAAACTGCA	NA
MWS		IG100013228	B02	71229019	0/1	0.24	NA	4.26	TGCAGTAGGAGACCAACATCAGTTGCATTGCAATACAGTGAGGAACTGAGGATGGGAAGTTGAGTAGAA	retrotransposon protein, putative, unclassified [Oryza sativa Japonica Group]
MWS		IG100188978	B04	16172495	0/1	0.25	NA	4.15	TGCAGCGCAGATCGCGTCAGGGAGACGGGAACGGAACACGGCCCG	NA
MWS		IG100359487|F|0-17:C>G-17:C>G	B06	20280267	C/G	0.12	NA	4.14	GTTGGTAGTCCGTGGTGTGCAAAGCTATCAGATACCTGTCAAGGAAATGTGGGGAGACAACAAGCTGCA	ORM1-like protein 2 [Zea mays]
MWS		IG100000697	B02	170471983	0/1	0.07	NA	4.09	TAAAAAAAGGGAAATAATACTAGGAACTGGAATATTTTTTTCCTTCGACGTTTTAGGTTCAGTTCTGCA	NA
MWS	TDW	IG100346407|F|0-67:A>G-67:A>G	A04	16941955	A/G	0.16	NA	4.73	CTGCCGCAGCGCGGGTGCGGTCGTGCGCCGCGGGGAGCCAGAAGGTGACGAAGCCGAAGAGCCACTGCA	probable transmembrane ascorbate ferrireductase 3 [Setaria italica]
MWS		D30275673|F|0-5:G>A-5:G>A	0	0	G/A	0.22	NA	4.57	TGCAGGTGAAAGAACTCTAGTGAAGTAAAAGCCTCAAACACTGGATTAATGCCTTGTCCTGCGTCCACG	NA
MWS		IG100179144|F|0-14:C>T-14:C>T	A04	616214	C/T	0.36	NA	4.45	TGCAGCGTCCAAGACGTCCCTACAGCTGCCG	probable acyl-activating enzyme 18, peroxisomal [Setaria italica]
MWS		IG18150288|F|0-32:G>A-32:G>A	A02	22682197	G/A	0.41	NA	4.38	CGGCAATGGCTCTGGACGGCACTCCAAACTTTGCAGCAAGGCCACCATCCTGCA	NA
MWS		IG100126968	A03	12069012	0/1	0.31	NA	4.13	TAACTCTTGGTGAGTAGTAAATTTCATTCACAAAATAACTAGCATGACAGGACAGCTTCTCTATCTGCA	NA
MWS		IG100092498|F|0-14:A>C-14:A>C	B04	33032404	A/C	0.19	NA	4.05	TGCAGAATGGACACACCATGGATGCATCGCTTTCAGATCTGGTCACTGAAAGGACATAAACAGATTTTT	NA
MWS	TFW	IG100179144|F|0-14:C>T-14:C>T	A04	616214	C/T	0.36	NA	4.81	TGCAGCGTCCAAGACGTCCCTACAGCTGCCG	probable acyl-activating enzyme 18, peroxisomal [Setaria italica]
MWS		IG100346407|F|0-67:A>G-67:A>G	A04	16941955	A/G	0.16	NA	4.55	CTGCCGCAGCGCGGGTGCGGTCGTGCGCCGCGGGGAGCCAGAAGGTGACGAAGCCGAAGAGCCACTGCA	probable transmembrane ascorbate ferrireductase 3 [Setaria italica]
MWS		IG100126968	A03	12069012	0/1	0.31	NA	4.4	TAACTCTTGGTGAGTAGTAAATTTCATTCACAAAATAACTAGCATGACAGGACAGCTTCTCTATCTGCA	NA
MWS		IG100217738|F|0-7:A>G-7:A>G	A04	138186941	A/G	0.48	NA	4.31	GCTTCCGCCTACTGACGCGGCCTGGGCACTGAAAGTAAGTTCAGCATGGCCTGCCGATTGTTGCCTGCA	cysteine-rich receptor-like protein kinase 42 [Setaria italica]
MWS		D30275673|F|0-5:G>A-5:G>A	0	0	G/A	0.22	NA	4.28	TGCAGGTGAAAGAACTCTAGTGAAGTAAAAGCCTCAAACACTGGATTAATGCCTTGTCCTGCGTCCACG	NA
MWS		IG100092498|F|0-14:A>C-14:A>C	B04	33032404	A/C	0.19	NA	4.27	TGCAGAATGGACACACCATGGATGCATCGCTTTCAGATCTGGTCACTGAAAGGACATAAACAGATTTTT	NA
MWS		IG18150288|F|0-32:G>A-32:G>A	A02	22682197	G/A	0.41	NA	4.17	CGGCAATGGCTCTGGACGGCACTCCAAACTTTGCAGCAAGGCCACCATCCTGCA	NA
MWS		IG100274689|F|0-33:C>T-33:C>T	A03	27438278	C/T	0.11	NA	4.12	TGCAGTCGCAGCTTGCCGTAGAGCCGCATCTTCCCGCCGCTCTCGTCGGCGGCGAGGTCGGTGGCCTCG	Auxin-induced in root cultures protein 12 [Dichanthelium oligosanthes]
MWS		IG100034614	B02	14884261	0/1	0.33	NA	4.09	TGCAGCAGGTCAGGATCTTGGGGCAGAATCTGGAAGCAAAAAGAGGAAAGCCGCGGTTCTGTCCGAGAT	girdin-like [Setaria viridis]
MWS	WUE	IG100346407|F|0-67:A>G-67:A>G	A04	16941955	A/G	0.16	NA	4.77	CTGCCGCAGCGCGGGTGCGGTCGTGCGCCGCGGGGAGCCAGAAGGTGACGAAGCCGAAGAGCCACTGCA	probable transmembrane ascorbate ferrireductase 3 [Setaria italica]
MWS		D30275673|F|0-5:G>A-5:G>A	0	0	G/A	0.22	NA	4.52	TGCAGGTGAAAGAACTCTAGTGAAGTAAAAGCCTCAAACACTGGATTAATGCCTTGTCCTGCGTCCACG	NA
MWS		IG18150288|F|0-32:G>A-32:G>A	A02	22682197	G/A	0.41	NA	4.42	CGGCAATGGCTCTGGACGGCACTCCAAACTTTGCAGCAAGGCCACCATCCTGCA	NA
MWS		IG100179144|F|0-14:C>T-14:C>T	A04	616214	C/T	0.36	NA	4.3	TGCAGCGTCCAAGACGTCCCTACAGCTGCCG	probable acyl-activating enzyme 18, peroxisomal [Setaria italica]
MWS		IG100369384	B01	190925003	0/1	0.07	NA	4.03	TTCCCTGCGAACACTTACAAATTTTGTAGTGGGTACAGGCCCTGATTGCAGTAGTATTGCAGAGCTGCA	disease resistance protein RGA2-like isoform X1 [Setaria viridis]
MWS		IG100008023	B04	44331223	0/1	0.41	NA	4	CCGTTGATATCTTGCAGTGACAATTCTTGGGCTGATTATAATGCTTACGCTGTTCGTGCACGAGCTGCA	Endoplasmic reticulum vesicle transporter protein [Zea mays]
DS-SWS	TFW	D23569652	B02	7364310	0/1	0.07	9.46446e-19	5.78	CGGTCAGAGAATCCTCTCCAAACCCTGCACCAGTCCACTAGTCATCATCATTAAGCTCACATCTCTGCA	GDSL esterase/lipase At5g45910 isoform X1 [Setaria italica]
		D30283400|F|0-27:G>T-27:G>T	B02	166472406	C/G	0.26	4.03715e-05	NA	AAGTGCACGGGCATCTCTTTTGTATTTTTTTCTAGTTTTGGCATTTCAGGTTACTAATTAATCCCTGCA	NA
		IG100126885	A03	125806364	C/G	0.13	2.28025e-10	2.53	CGCACGGAAGTTCTTCGCGCCAAATCCAGATCGACCCGTCCAGAGGAGCAGCTCCTCTTGCACTCTGCA	NA
		IG100331826	B03	10779294	0/1	0.3	2.18568e-07	3.66	TGCAGATCAGCTTAAGAAAGAGTTTGCAGAGGGGCAGCTAGTGGCATGGCCACCGTCGCCATGGACGGT	NA
		IG100244504	A05	45415888	0/1	0.31	NA	2.57	TGCAGAGATTCAGAAACCTGTACTGAAGCCGCCAGACGCCAGTAAAAACGCCG	NA
		IG100292170|F|0-44:C>T-44:C>T	B06	99625821	C/T	0.12	NA	4.7	TGCAGTTCACCCTCACCTCACGCTGCACTGATGGTGCCGCTAGACGCCTACCGTGGCCGAGCAGATGGA	NA
		D23560306	0	0	0/1	0.22	NA	5.67	TGCAGCCTATATAAGATCTCCCCGTAATGCATTCGAACGTTTGTATGTAGTTTCCTTGGTTCCG	NA
		D18070887	0	0	0/1	0.23	NA	5.48	TGCAGAACACTAGATTAGAATGTAATCCG	NA
		D23642870	A07	98462267	0/1	0.28	NA	5.11	TCTCGCCGTGCAGGATTGTGGAGGCCACGCGATGGCTCGTCCGCGGCTGGTAAAACTTCTCCAACTGCA	hydroxyphenylpyruvate reductase [Setaria italica]
		D23571359	A05	81021618	0/1	0.1	NA	5.05	TGCAGGTGGCTCTCGGAGGGGGAGCCGATGTAGTATACTAGTATGGCTGCCG	transferase, transferring glycosyl groups [Zea mays]
		D23629958|F|0-15:G>A-15:G>A	A05	82342843	G/A	0.17	NA	4.97	TGCAGCTCGTGCACCGCCGTGTTCATGTCCGCGACGGCGAGGTCCAGCGCACGGGAGGACGCCGTCATC	aluminum-activated malate transporter 10-like [Setaria viridis]
		D23590289|F|0-18:T>C-18:T>C	B02	19665391	T/C	0.13	NA	4.76	TGCAGCAGCAGCTAGCAGTTATGAACATGACTAGCCCCAGGCTAAAGCTCTTCGGCTTCCACGTCTCCG	zinc finger protein GIS3 [Setaria italica]
		D23591014	0	0	0/1	0.2	NA	4.74	TGCAGCCACAAGGACTCAGACGGGCGGCCACCGCCGCTTCCGCAGGGATGCTGGGGTGCTCCGCCGCTG	NA
		D23569572	B02	16159303	0/1	0.11	NA	4.72	GTCGGCCCGTGCCACCATTACTTAAACTTTGGCCATTCTGGACAGAGTGATGCCTGACCAGGGGCTGCA	NA
		D23569957	B02	19556232	0/1	0.11	NA	4.46	TGCAGCTCAGCTCCTCCAGGAACACCATCTTCCCACGCTCGAACGTAACGCCGCCACCAGCGCCGAGAT	probable leucine-rich repeat receptor-like protein kinase At1g68400 [Setaria viridis]
		D23637610|F|0-35:A>G-35:A>G	A05	82474826	A/G	0.08	NA	4.41	CGGGCGTGCTCGAGCTGGAGCCCATCTGCGACGCTTTCTGCA	protein indeterminate-domain 4, chloroplastic [Setaria italica]
		D23569706	A07	74679219	0/1	0.16	NA	4.41	TGCAGATATTTAATGCTCTGCACCACACAAGTGCATGCGTGGAAGGATGAGAGTGGATCATTCGATGCC	NA
		D23569958	0	0	0/1	0.14	NA	4.36	TGCAGCTCAGGCAGGGGACGCGCGGGAGACGGCCAGCCACTGGCTCTCGCCCCCCTCACACAGACCGAG	NA
		IG100218301	A02	46585403	0/1	0.22	NA	4.35	GAACAAACTAGTGTTTTCAGATTGGATCTCCGAATAAGAACAACACCTCCTCTCCCAACGTGGCCTGCA	NA
		D23615732	B02	10309933	0/1	0.08	NA	4.28	GGCAGCCCCCTCCATGGCAAGGGCAAGCGAGGCGGCAGCGACGGCGGCGGCGGGAGGAGCAGGCCTGCA	NA
		IG100276840	B02	19655027	0/1	0.29	NA	4.19	TGCAGTTTTGAGGATATTAAGAACTCATCAGGGTGTACAGTCAGTGGCAGAGCTTGATGATCAACCGAG	NA
		IG100044163	A05	80439022	0/1	0.34	NA	4.15	TGCAGACACCAAACCGAGGGCACTCAAGCTACTCCAGGTAGCCCAAAGCAAAAACCATGTACAGGCAGC	protein S-acyltransferase 21 [Setaria italica]
		IG100117001	B01	24187773	0/1	0.46	NA	4.13	TGCAGGTAACCCTTGATAGTCACGATCATCCTGGACGCCTTGTTATATACCATTGCATTAGTAATGTTC	NA
		D18078962	0	0	0/1	0.06	NA	4.08	TGCAGTTGGCGAAAGCGCGACCGTCATCAGCCG	NA
		D23571139	B01	53716975	0/1	0.06	NA	4.08	CGGACCACATGCACGCCTGATCGCAAGTGTCGCAGAGGATCCTGCA	DEAD-box ATP-dependent RNA helicase 27 [Zea mays]
		D23571427	B02	3166525	0/1	0.06	NA	4.08	CGGCGTCCATGAGAAAAATGTCGCCTTTGGACTGCA	NA
		D23571535	B02	10709791	0/1	0.06	NA	4.08	CGGTTGTCACTCTATACCGTCTCACGAAACAAAGCAGCATCCAAGCTAGAGACCACTGCA	NA
		D30289900	B02	22343290	0/A	0.24	NA	4.04	TGCAGGCGTCGCTCCTCATGTCAGCCGTCGTCTGTGTGCTGGTCTCCGTGCTGTGGTGCTTCACGGAGC	NA
		D23547539	A07	80562088	0/1	0.24	NA	4.04	TCTCGGCGTCCGCGTGTCGAGCGTCGCCATGCTTGCGGAGTGCGGTGTCAAGGACCTGAGCTCGCTGCA	NA
		D23602483	0	0	0/1	0.45	NA	4.04	TGCAGGCATCAGTGATTCGGAGAAGGCCACCCG	NA
		IG100025975	A02	6767997	0/1	0.41	NA	4.04	TCACCTGCAAGCTAGAGTAGGGGGCCGCGGCCGCTGCTGTCGCAAACTCTCAATGCCCATGCTTCTGCA	NA
		D23557963	0	0	0/1	0.42	NA	4.02	TGCAGGTCCTTCCACCGTCACCGTCGTCGAGGCTCCTCGCCGTAGAGGTGCCG	NA
		D23555223	B05	36640315	0/1	0.49	NA	4	TGCAGCTCAGATGGTTCAGGAGTCTGACGCCCG	NA
	TDW	D23592459	A01	157193247	0/1	0.1	1.25323e-09	5.22	CTCTGCTCTGTGCTCGCCGTTGATGAGGATTTCCAGTCAAACTCGAACCTCCTGCCATGCTGTCCTGCA	NA
		IG100288904|F|0-22:C>G-22:C>G	B02	72599462	C/G	0.2	2.36843e-06	2.78	TGCAGGTGGCGTCGTCGTCGTCCCCGTCTCCGCCTCCG	60 kDa jasmonate-induced protein [Zea mays]
		IG100292170|F|0-44:C>T-44:C>T	B06	99625821	C/T	0.12	3.46142e-06	5.07	TGCAGTTCACCCTCACCTCACGCTGCACTGATGGTGCCGCTAGACGCCTACCGTGGCCGAGCAGATGGA	NA
		D23569652	B02	7364310	0/1	0.07	NA	5.81	CGGTCAGAGAATCCTCTCCAAACCCTGCACCAGTCCACTAGTCATCATCATTAAGCTCACATCTCTGCA	GDSL esterase/lipase At5g45910 isoform X1 [Setaria italica]
		D23560306	0	0	0/1	0.22	NA	5.27	TGCAGCCTATATAAGATCTCCCCGTAATGCATTCGAACGTTTGTATGTAGTTTCCTTGGTTCCG	NA
		D23571359	A05	81021618	0/1	0.1	NA	5.22	TGCAGGTGGCTCTCGGAGGGGGAGCCGATGTAGTATACTAGTATGGCTGCCG	transferase, transferring glycosyl groups [Zea mays]
		D23629958|F|0-15:G>A-15:G>A	A05	82342843	G/A	0.17	NA	4.93	TGCAGCTCGTGCACCGCCGTGTTCATGTCCGCGACGGCGAGGTCCAGCGCACGGGAGGACGCCGTCATC	aluminum-activated malate transporter 10-like [Setaria viridis]
		D18070887	0	0	0/1	0.23	NA	4.91	TGCAGAACACTAGATTAGAATGTAATCCG	NA
		D23642870	A07	98462267	0/1	0.28	NA	4.72	TCTCGCCGTGCAGGATTGTGGAGGCCACGCGATGGCTCGTCCGCGGCTGGTAAAACTTCTCCAACTGCA	hydroxyphenylpyruvate reductase [Setaria italica]
		D23569572	B02	16159303	0/1	0.11	NA	4.71	GTCGGCCCGTGCCACCATTACTTAAACTTTGGCCATTCTGGACAGAGTGATGCCTGACCAGGGGCTGCA	NA
		IG100044163	A05	80439022	0/1	0.34	NA	4.69	TGCAGACACCAAACCGAGGGCACTCAAGCTACTCCAGGTAGCCCAAAGCAAAAACCATGTACAGGCAGC	protein S-acyltransferase 21 [Setaria italica]
		D23590289|F|0-18:T>C-18:T>C	B02	19665391	T/C	0.13	NA	4.61	TGCAGCAGCAGCTAGCAGTTATGAACATGACTAGCCCCAGGCTAAAGCTCTTCGGCTTCCACGTCTCCG	zinc finger protein GIS3 [Setaria italica]
		D23569958	0	0	0/1	0.14	NA	4.49	TGCAGCTCAGGCAGGGGACGCGCGGGAGACGGCCAGCCACTGGCTCTCGCCCCCCTCACACAGACCGAG	NA
		IG100276840	B02	19655027	0/1	0.29	NA	4.46	TGCAGTTTTGAGGATATTAAGAACTCATCAGGGTGTACAGTCAGTGGCAGAGCTTGATGATCAACCGAG	NA
		D23569957	B02	19556232	0/1	0.11	NA	4.42	TGCAGCTCAGCTCCTCCAGGAACACCATCTTCCCACGCTCGAACGTAACGCCGCCACCAGCGCCGAGAT	probable leucine-rich repeat receptor-like protein kinase At1g68400 [Setaria viridis]
		D23591014	0	0	0/1	0.2	NA	4.38	TGCAGCCACAAGGACTCAGACGGGCGGCCACCGCCGCTTCCGCAGGGATGCTGGGGTGCTCCGCCGCTG	NA
		IG100025975	A02	6767997	0/1	0.41	NA	4.31	TCACCTGCAAGCTAGAGTAGGGGGCCGCGGCCGCTGCTGTCGCAAACTCTCAATGCCCATGCTTCTGCA	NA
		IG100218301	A02	46585403	0/1	0.22	NA	4.3	GAACAAACTAGTGTTTTCAGATTGGATCTCCGAATAAGAACAACACCTCCTCTCCCAACGTGGCCTGCA	NA
		D23602483	0	0	0/1	0.45	NA	4.27	TGCAGGCATCAGTGATTCGGAGAAGGCCACCCG	NA
		D23615732	B02	10309933	0/1	0.08	NA	4.2	GGCAGCCCCCTCCATGGCAAGGGCAAGCGAGGCGGCAGCGACGGCGGCGGCGGGAGGAGCAGGCCTGCA	NA
		D23637610|F|0-35:A>G-35:A>G	A05	82474826	A/G	0.08	NA	4.13	CGGGCGTGCTCGAGCTGGAGCCCATCTGCGACGCTTTCTGCA	protein indeterminate-domain 4, chloroplastic [Setaria italica]
		D23569706	A07	74679219	0/1	0.16	NA	4.13	TGCAGATATTTAATGCTCTGCACCACACAAGTGCATGCGTGGAAGGATGAGAGTGGATCATTCGATGCC	NA
		IG100292148|F|0-23:C>G-23:C>G	B01	178867329	C/G	0.35	NA	4.04	TGCAGGCCCTCGGAGTCGACGCGCAAGGCGGCGGAAGGGCCCTCGCCGTCATCGGAGGAGGCGGGGAAG	probable ureidoglycolate hydrolase [Setaria italica]
		IG100331826	B03	10779294	0/1	0.3	NA	4.01	TGCAGATCAGCTTAAGAAAGAGTTTGCAGAGGGGCAGCTAGTGGCATGGCCACCGTCGCCATGGACGGT	NA
		D23570021	B02	6718433	0/1	0.08	NA	4.01	GGCGATAATGTGACGATGGACCCGTGACCGTGAGCCACATCAAACGTCGTCGTCGATCGTCTTCCTGCA	NA
	WUE	IG100328744	A01	63184475	0/1	0.16	3.00615e-05	2.08	TGCAGGCGGGCTTCCCGCACAAATGACGCTGCTGATGCATTCCG	NA
		IG100288904|F|0-22:C>G-22:C>G	B02	72599462	C/G	0.2	4.15311e-14	2.8	TGCAGGTGGCGTCGTCGTCGTCCCCGTCTCCGCCTCCG	60 kDa jasmonate-induced protein [Zea mays]
		IG100117610	A05	6007270	0/1	0.28	2.07126e-06	3.04	TGCAGGTCCGATGCCACGGAGCTGTCTGTCTCCCCGTTAAATCTGACGCCTCCAGTGGTTAGCGTGGGC	prolyl 4-hydroxylase 1 isoform X3 [Panicum hallii]
		D23623406|F|0-59:G>A-59:G>A	A05	10548210	G/A	0.16	4.1654e-07	3.73	TGCAGCGTGATAACACTTGTGGGACAAAATACAAAGTGATACGGATACGCAGATACGACGCAGTGTTTT	NA
		IG100292170|F|0-44:C>T-44:C>T	B06	99625821	C/T	0.12	4.44288e-16	5.08	TGCAGTTCACCCTCACCTCACGCTGCACTGATGGTGCCGCTAGACGCCTACCGTGGCCGAGCAGATGGA	NA
		IG100044163	A05	80439022	0/1	0.34	NA	5.19	TGCAGACACCAAACCGAGGGCACTCAAGCTACTCCAGGTAGCCCAAAGCAAAAACCATGTACAGGCAGC	protein S-acyltransferase 21 [Setaria italica]
		D23569652	B02	7364310	0/1	0.07	NA	5.15	CGGTCAGAGAATCCTCTCCAAACCCTGCACCAGTCCACTAGTCATCATCATTAAGCTCACATCTCTGCA	GDSL esterase/lipase At5g45910 isoform X1 [Setaria italica]
		D23592459	A01	157193247	0/1	0.1	NA	4.8	CTCTGCTCTGTGCTCGCCGTTGATGAGGATTTCCAGTCAAACTCGAACCTCCTGCCATGCTGTCCTGCA	NA
		D23571359	A05	81021618	0/1	0.1	NA	4.8	TGCAGGTGGCTCTCGGAGGGGGAGCCGATGTAGTATACTAGTATGGCTGCCG	transferase, transferring glycosyl groups [Zea mays]
		D23560306	0	0	0/1	0.22	NA	4.67	TGCAGCCTATATAAGATCTCCCCGTAATGCATTCGAACGTTTGTATGTAGTTTCCTTGGTTCCG	NA
		IG100276840	B02	19655027	0/1	0.29	NA	4.54	TGCAGTTTTGAGGATATTAAGAACTCATCAGGGTGTACAGTCAGTGGCAGAGCTTGATGATCAACCGAG	NA
		IG100025975	A02	6767997	0/1	0.41	NA	4.52	TCACCTGCAAGCTAGAGTAGGGGGCCGCGGCCGCTGCTGTCGCAAACTCTCAATGCCCATGCTTCTGCA	NA
		IG100331826	B03	10779294	0/1	0.3	NA	4.49	TGCAGATCAGCTTAAGAAAGAGTTTGCAGAGGGGCAGCTAGTGGCATGGCCACCGTCGCCATGGACGGT	NA
		D23642870	A07	98462267	0/1	0.28	NA	4.46	TCTCGCCGTGCAGGATTGTGGAGGCCACGCGATGGCTCGTCCGCGGCTGGTAAAACTTCTCCAACTGCA	hydroxyphenylpyruvate reductase [Setaria italica]
		IG100292148|F|0-23:C>G-23:C>G	B01	178867329	C/G	0.35	NA	4.39	TGCAGGCCCTCGGAGTCGACGCGCAAGGCGGCGGAAGGGCCCTCGCCGTCATCGGAGGAGGCGGGGAAG	probable ureidoglycolate hydrolase [Setaria italica]
		D23629958|F|0-15:G>A-15:G>A	A05	82342843	G/A	0.17	NA	4.37	TGCAGCTCGTGCACCGCCGTGTTCATGTCCGCGACGGCGAGGTCCAGCGCACGGGAGGACGCCGTCATC	aluminum-activated malate transporter 10-like [Setaria viridis]
		D23602483	0	0	0/1	0.45	NA	4.3	TGCAGGCATCAGTGATTCGGAGAAGGCCACCCG	NA
		D18070887	0	0	0/1	0.23	NA	4.26	TGCAGAACACTAGATTAGAATGTAATCCG	NA
		IG100218301	A02	46585403	0/1	0.22	NA	4.2	GAACAAACTAGTGTTTTCAGATTGGATCTCCGAATAAGAACAACACCTCCTCTCCCAACGTGGCCTGCA	NA
		D23569958	0	0	0/1	0.14	NA	4.14	TGCAGCTCAGGCAGGGGACGCGCGGGAGACGGCCAGCCACTGGCTCTCGCCCCCCTCACACAGACCGAG	NA
		D23569572	B02	16159303	0/1	0.11	NA	4.12	GTCGGCCCGTGCCACCATTACTTAAACTTTGGCCATTCTGGACAGAGTGATGCCTGACCAGGGGCTGCA	NA
		IG100188811	0	0	0/1	0.22	NA	4.09	TGCAGATCTAGGCCCGTGCGGAATCTGCGTGCCACCGTGCGCGCGCACGCCCCCGCCG	NA
		D23555223	B05	36640315	0/1	0.49	NA	4.08	TGCAGCTCAGATGGTTCAGGAGTCTGACGCCCG	NA
		D23590289|F|0-18:T>C-18:T>C	B02	19665391	T/C	0.13	NA	4.04	TGCAGCAGCAGCTAGCAGTTATGAACATGACTAGCCCCAGGCTAAAGCTCTTCGGCTTCCACGTCTCCG	zinc finger protein GIS3 [Setaria italica]
		D23599290	A05	79862455	0/1	0.08	NA	4.01	CGGTGCTTGCTAATTGCCTTCACCAGTCACCGATTGAATCTGCA	protein NRT1/ PTR FAMILY 8.3-like [Setaria viridis]
	PH	IG100218301	A02	46585403	0/1	0.22	2.01564e-08	5.12	GAACAAACTAGTGTTTTCAGATTGGATCTCCGAATAAGAACAACACCTCCTCTCCCAACGTGGCCTGCA	NA
		IG100109748|F|0-53:C>T-53:C>T	B03	81852583	C/T	0.13	8.35965e-08	2.91	ATGAATCAGGGCATCGTCTTGCGTCTTCTTTTAAGCTGCCGAACCAGCTACTAGGAAGTTTAAGCTGCA	NA
		D23600991|F|0-6:G>A-6:G>A	B05	34869947	G/A	0.28	1.50937e-06	5.18	CGGCCGCGGAGGCGAGCTCGTCGGCGTCCGCTGCA	NA
		IG18095269|F|0-20:C>T-20:C>T	A07	89214569	C/T	0.28	2.11268e-14	6.18	CGTGCCCGCCCAGGTGCGTGAACAGGAGCGACGGCCAGTAACCCACCAGCGGGCCCGACCCCAGCTGCA	NEP-interacting protein 1 [Zea mays]
		IG100014721	0	0	0/1	0.12	NA	5.51	TGCAGTGGATCCAGGTACCTTCTCCAGCTCCCCTCCACCCTCCTTCGCATCATCCCTTCCCG	NA
		IG100044163	A05	80439022	0/1	0.34	NA	5.02	TGCAGACACCAAACCGAGGGCACTCAAGCTACTCCAGGTAGCCCAAAGCAAAAACCATGTACAGGCAGC	protein S-acyltransferase 21 [Setaria italica]
		IG100042453	B02	11815163	0/1	0.48	NA	4.81	GGTTTTGTTCTCTGAAAGATCTAGGAAGATGGAATGGTAGACAGCATATATTTGTAGCCTTTCTCTGCA	Carboxyl-terminal proteinase [Zea mays]
		D9989465|F|0-36:G>A-36:G>A	B03	68521289	G/A	0.33	NA	4.73	CGCCTGCTTCCTCCACCGCTGCTCGAAGTTGGCGAGCACGTCCCACGCCGCGGGACCCTCCAGCCTGCA	Phospholipase D alpha 1 [Capsicum annuum]
		IG100014084	A05	3136807	0/1	0.43	NA	4.67	TATGTTTTATATTTAGCAATCAGACACAAATTCACATTGACTCCGTTAGGGGAGCATATTAAGACTGCA	NA
		IG100292170|F|0-44:C>T-44:C>T	B06	99625821	C/T	0.12	NA	4.65	TGCAGTTCACCCTCACCTCACGCTGCACTGATGGTGCCGCTAGACGCCTACCGTGGCCGAGCAGATGGA	NA
		IG100331872	A02	3948000	0/1	0.39	NA	4.58	TGCAGATCGAGCCTGATACAAAACGTGCGTCCCCAATCACACCAAAACCGCTCCCAGACGCGTGTCCCA	NA
		IG100117001	B01	24187773	0/1	0.46	NA	4.58	TGCAGGTAACCCTTGATAGTCACGATCATCCTGGACGCCTTGTTATATACCATTGCATTAGTAATGTTC	NA
		IG100257233|F|0-20:C>T-20:C>T	A04	35285587	C/T	0.17	NA	4.55	GCGAGTTCCTCCTCCTCGAGTTTCTCCGCCTCGCTGCCCAGGTCTGTCGCCACCCACGCCGTGCCTGCA	NA
		IG100005922	A01	181294870	0/1	0.31	NA	4.52	TCGGAGACAGAAGAGGCGACGAAAGTTGGCGCTAGTAGTAGTAGGAAGAGCAGGAGGCACATGGCTGCA	LOW QUALITY PROTEIN: leucine-rich repeat receptor protein kinase MSL1 [Setaria italica]
		IG100365712|F|0-7:C>T-7:C>T	0	0	C/T	0.11	NA	4.5	TGCAGTGCGGTTCGCGGCGGCCG	NA
		IG10000759|F|0-40:A>G-40:A>G	B02	144961999	A/G	0.11	NA	4.5	CGGGTGCGTAGAAGAGGACGCTGGTTGGGGTGTAGATGCCCTGCA	non-classical arabinogalactan protein 31-like [Panicum miliaceum]
		IG100235716	0	0	0/1	0.22	NA	4.49	TGCAGACATTGGGGTAGTTGGAGCAGGCGGACGACACTGCATGGTGGCCGTACGTGGAGAAGAGCGCTG	NA
		IG100363339|F|0-55:G>A-55:G>A	B02	126460508	G/A	0.08	NA	4.4	TGGATGGGCTGAGCTCCCCATGGTAGATCTTCTTGGCGTGCAGGTACTCCATCCCGCGCGCGATCTGCA	light-sensor protein kinase [Phtheirospermum japonicum]
		IG100033112	B02	12845481	0/1	0.48	NA	4.32	TGCAGTGTCAATGGCCTGCACTGCTAATCTGCTAGCGCCCACGGTCTTGCAGCACCAACTGATTTCACC	NA
		IG100273293	B04	98604897	0/1	0.1	NA	4.23	AAGAGAGAGAGAGAGAGAGAGGGAACGAGCCAGAGAGAAGCAGAGGGAGGGAGTCTGATGGAACCTGCA	NA
		IG100001981	B01	4027858	0/1	0.11	NA	4.23	TGCAGAGAGCAGGTTTCTAAAAAACAAAATATGCTGGCTGCTGGTCATGAATTTCCTTACATTCCCTTG	NA
		IG100000353	B01	4043781	0/1	0.11	NA	4.23	TGCAGAAAAGTTAGTCCTTAATCTGTTGCAGCCAATTTATGGCTACATTTCACGAACTATGTTTTCTCT	NA
		IG100098908	B01	5078283	0/1	0.11	NA	4.23	CGTCGTGTACGTGTGGTGGGCGTGATAAGCATGTTTGCAAATTTGCAAAACCTCTATCCTCTTGCTGCA	NA
		IG100273530|F|0-18:T>G-18:T>G	B01	92943079	T/G	0.43	NA	4.21	TGCAGGTTTGGTGATCCTTGGAAAAGGGAGTGTCGAGAGCTTCTTCTTCATTATCTTATCTTAATCAGG	NA
		IG100096419|F|0-15:C>G-15:C>G	A07	18452556	C/G	0.48	NA	4.18	TGCAGATAGTACTCTCAGAAGCTTTATATGCATCAGACCATAACTATCCAACAGGTGTCGCTGCTATTT	NA
		IG100132792	A02	150264952	0/1	0.18	NA	4.09	AAACCGTGCATTTTCCTTTCTCTCTCTCTCTCTCTCTCTCTCTCGCATGATCCATCATGCATTCCTGCA	Wall-associated receptor kinase 3 [Triticum urartu]
		IG9965064|F|0-63:G>A-63:G>A	B03	113837605	G/A	0.1	NA	4.06	CTCGGCGGCCAAGGCGGAGGCCGCCGTGTTTAGCCCGTATTCGAGTCCGAGCACGGCGTTGCTGCTGCA	BTB/POZ domain-containing protein At5g48130 [Setaria italica]
		IG100302005|F|0-14:G>T-14:G>T	A04	16710217	G/T	0.1	NA	4.02	AATCTGGTTCCAGAAAAAGAGGAGAACATGAATGGCTGCACAGTTAAAACAGTGCTTCCATTCCCTGCA	putative serine/threonine-protein kinase dyrk2 [Dichanthelium oligosanthes]
	LL	IG100218301	A02	46585403	0/1	0.22	2.30914e-09	7.72	GAACAAACTAGTGTTTTCAGATTGGATCTCCGAATAAGAACAACACCTCCTCTCCCAACGTGGCCTGCA	NA
		IG100009581	A07	87933246	0/1	0.33	8.4521e-10	4.14	TGCAGGAGCAAGAGACGGTTGCACCATTGCAACGCAACAGGGGGCCTAGGGGCACTGCAAAGTGTGAGA	LEAF RUST 10 DISEASE-RESISTANCE LOCUS RECEPTOR-LIKE PROTEIN KINASE-like 2.5 isoform X1 [Setaria italica]
		D9989465|F|0-36:G>A-36:G>A	B03	68521289	G/A	0.33	NA	5.23	CGCCTGCTTCCTCCACCGCTGCTCGAAGTTGGCGAGCACGTCCCACGCCGCGGGACCCTCCAGCCTGCA	Phospholipase D alpha 1 [Capsicum annuum]
		IG100001981	B01	4027858	0/1	0.11	NA	5.23	TGCAGAGAGCAGGTTTCTAAAAAACAAAATATGCTGGCTGCTGGTCATGAATTTCCTTACATTCCCTTG	NA
		IG100000353	B01	4043781	0/1	0.11	NA	5.23	TGCAGAAAAGTTAGTCCTTAATCTGTTGCAGCCAATTTATGGCTACATTTCACGAACTATGTTTTCTCT	NA
		IG100098908	B01	5078283	0/1	0.11	NA	5.23	CGTCGTGTACGTGTGGTGGGCGTGATAAGCATGTTTGCAAATTTGCAAAACCTCTATCCTCTTGCTGCA	NA
		D23607728	0	0	0/1	0.1	NA	5.15	TGCAGCAAATGATCAAGCAGCAGCCG	NA
		IG100233845	A03	125636779	0/1	0.18	NA	4.71	TGCAGTGTGTTGGCACTACTAGCTGATTGTACGTATTGTACAGATAAGAACCATTCAGCAACCTACGGT	NA
		D30277943|F|0-27:T>C-27:T>C	A04	26094542	T/C	0.09	NA	4.52	TGCAGGTAGGTACGTAGAAAAGGAGAGTATTACCATGTTTGCAGAGCAGGCAGCTGGAGAATGAAGAGT	NA
		D23560214	A05	67044780	0/1	0.33	NA	4.52	GGACAAAGTGGATTGCTTCGGGTAGTCAATGAAGTTTTCCTTTTCTAAATGGTAGATTCAGATGCTGCA	NA
		D23604994	B03	44023352	0/1	0.17	NA	4.46	CGGAGAAGGGGTGGAGCGGGACTTCCTGCTGCA	NA
		IG18095269|F|0-20:C>T-20:C>T	A07	89214569	C/T	0.28	NA	4.25	CGTGCCCGCCCAGGTGCGTGAACAGGAGCGACGGCCAGTAACCCACCAGCGGGCCCGACCCCAGCTGCA	NEP-interacting protein 1 [Zea mays]
		IG100215828	B07	14640086	0/1	0.12	NA	4.17	TGCAGGAAAATGCCCAATAGCAGCGGCCCACCGTCCTCTCCCCGCTCCCCAGCAAAAACTCCTCGGCCC	NA
		D30290118	B04	29199989	0/A	0.29	NA	4.15	CGGCCGAAGAGTTGAGGAAGTCGCCGAGAGGAGCCTGCA	NA
		IG100349256	A01	10136913	0/1	0.12	NA	4.1	TCATCTTGTCGTAGTACCTGTCCCAGACCATGATGCCGCCATAGTTGGGCACCTTCTGCGCGAACTGCA	xylanase inhibitor protein 2-like [Setaria viridis]
		IG100020477	B01	25559753	0/1	0.22	NA	4.09	CGGCGTGAGGGTAGACGTGGATCCACACCACGCGGTGGTAGCTGCA	E3 ubiquitin-protein ligase SINA-like 3 [Panicum hallii]
		D23577204	0	0	0/1	0.1	NA	4.07	TGCAGCACGGAGCTTCCTCGACCG	NA
		D23631596|F|0-26:C>A-26:C>A	A02	17883459	C/A	0.11	NA	4.06	CGGTAACAATGTGAGATCTCTAACAATGTTGGCCTGCTGCA	NA
		D23592459	A01	157193247	0/1	0.1	NA	4.02	CTCTGCTCTGTGCTCGCCGTTGATGAGGATTTCCAGTCAAACTCGAACCTCCTGCCATGCTGTCCTGCA	NA
		D23571359	A05	81021618	0/1	0.1	NA	4.02	TGCAGGTGGCTCTCGGAGGGGGAGCCGATGTAGTATACTAGTATGGCTGCCG	transferase, transferring glycosyl groups [Zea mays]
	LW	IG100210744	B04	108499972	0/1	0.14	1.88318e-06	NA	TGCAGCCTGCATGTACGTCCGTCTCCAATTTCTCGCCCTCCTCTACCCCTTTCCTTTCGCGCCGATCGA	NA
		IG100023744	B06	71606589	0/1	0.45	1.19955e-16	3.91	CGGACATTGGACACCACTAGTAACAGATCCATTGTCAGTAACTCAGGACCTGCA	NA
		IG100177972|F|0-16:T>C-16:T>C	0	0	T/C	0.23	NA	5.39	TGCAGCCGCAGCGCCGTGACGGGAGACCG	NA
		IG100257033	0	24982516	0/1	0.11	NA	4.98	CGGCGACTCCGAGGAGGAGATCCATCGGCTCATCGCCAGCTATCGCTGCCTCGACGACCTCATGCTGCA	F-box/LRR-repeat protein At3g26922-like [Triticum dicoccoides]
		IG100031681	B02	148704131	0/1	0.12	NA	4.74	CGGCGGGCGGGCGTGCAGTGGGTATTAACTCCTGTTTGATTGACATTCATTCTGCA	NA
		IG10009854|F|0-54:G>A-54:G>A	A03	76025884	G/A	0.07	NA	4.72	CGGAGTACGCGCGGTGCAAGTCGGTGATCCACGACGAGCTCCGCAGCTTCCGCGTGTTCCTGCA	Ras guanine nucleotide exchange factor K [Zea mays]
		IG100121800	A01	49554081	0/1	0.3	NA	4.7	TCGGTAGAGATGACCTTATCGAGAATATAGCCGATAAAGATGAGTGCGCAAAAGATGACAGAGACTGCA	NA
		IG100302280|F|0-57:C>G-57:C>G	A06	8211788	C/G	0.06	NA	4.45	CCAGTCAACGAGCTCCTGCTCCTCGGCCATGTCGCACTCCACCACGTCGAGCACTCGCAGCGCCCTGCA	transport inhibitor response 1-like protein [Setaria italica]
		IG100122928|F|0-11:T>C-11:T>C	A03	1111702	T/C	0.37	NA	4.42	AGCATGGTGAGGCGATGGGTCGCCGAACGGTGTGTAGACAAAGAGCCAGGAGAAGAGAGGAGCACTGCA	disease resistance protein PIK6-NP [Zea mays]
		IG100253609	A01	81576335	0/1	0.19	NA	4.3	CGGATCGAGTAATGGCGCGGCTCGCTGGCCCTGCTGCA	NA
		D23546910	B01	1715830	0/1	0.28	NA	4.23	CGGAGGACACGACGACGGCGGCGGCGGCGGCGGCGGCTCGGCAGAGCACCAGACCTGCTGCA	RING-H2 finger protein ATL74 [Sorghum bicolor]
		IG100030567	A07	96622111	0/1	0.2	NA	4.19	AATTCTATTTTGAGGTCGAGGAGCACTTGGAAGTTGGAACAGCTAGGTCGATGTGCAATGTGTGCTGCA	NA
		IG100001446	0	0	0/1	0.39	NA	4.18	TGCAGACCCTCGCGCCGCCGCGGCTTCCTTCCTTGCTGCCGCCGCCGCTCGCAGTTGCCACAGGCGTTC	NA
		IG100002953	0	0	0/1	0.23	NA	4.11	TGCAGATATATCATTAAAATTCTATGTCCTCACATTAATTTTAAAAGTCGTCATATCAGAGTTATTAAA	NA
		IG100184426	A02	5910624	0/1	0.1	NA	4.04	CGGGACGCGCAGCAGCTGTGCGGCTTCGACAAGGACGTGGCCGTCTTCTACGACAACTGCA	cysteine-rich receptor-like protein kinase 6 [Panicum hallii]
	TN	IG100029702	A01	194732797	0/1	0.27	3.45232e-08	4.34	TGCAGGACTCGAGGCTGTCAACAGAACAGAGTGTGATGATGGGGATGAATTGATGACGCAATCCAGGGA	NA
		IG100359692	A02	123198708	0/1	0.16	1.32127e-16	4.7	GCTGCTCACTGTCATCATCTATTCCGAGTCTCTCCAGCTGATGCAGCTATTTTCACTGCGGGGCCTGCA	putative FBD-associated F-box protein At5g56690 [Setaria italica]
		IG100219166	A04	44189413	0/1	0.48	7.84875e-11	3	TGCAGGCGTGGTGCTACCGCCCTTGCACCAGATTCGTCTGACGCTCCGAAGGAACGAGTGATGCGGTGA	NA
		IG100278405	A06	59780114	0/1	0.13	6.75357e-14	2.57	TGCAGTGAGGGCTTCCAAACCTTTAAAAAAAATTTGAATTTCACCATGTGGCACAGGCTGGCTTGGACC	NA
		IG100269095|F|0-49:C>G-49:C>G	A01	20632854	C/G	0.48	NA	5.25	GGGACGCGATGAAGGCGGTGGTGTTGAAGAAGAAGAAAGCCCTGTAGCGCCCAGGATGGAGGTCCTGCA	NA
		IG100133830	A01	174224302	0/1	0.22	NA	5.04	TGCAGCCCCAATGGAATTCCGTTCTCACATGGGAACCCCAAACCTCTCCGCGTCCTAGGGGTCGTCCTA	NA
		IG100019568	0	0	0/1	0.07	NA	4.73	TGCAGCCGCGCGTGCAGCGCTCCGCCGCCGCGCCTGGTCGCCTCCG	NA
		IG100246084	0	0	0/1	0.46	NA	4.62	TGCAGCATGAGAGAGAGGAGGCGCACAACTCCCCG	NA
		IG100093181	A01	164265010	0/1	0.22	NA	4.62	TGCAGACCATGGAATCCATTTTGTCTCTGATCTGTTAACCTCAAGTGGCCAATGGAATGCTGACCTTAT	NA
		IG100106512	A01	83917907	0/1	0.16	NA	4.44	GGGGGGGGGGGGGGACGTGATAGCACACGTTATCCCTTTCCCGACGTTTTTTGAGGAAAAACCGCTGCA	NA
		IG100014734	A01	85354919	0/1	0.16	NA	4.44	TGCAGTGGCACAATATGCTACTAGTTTGGTGGGTGCTAGGGAGGAGGGAACAGAGATGGCCATGGCAAG	NA
		IG100292148|F|0-23:C>G-23:C>G	B01	178867329	C/G	0.35	NA	4.43	TGCAGGCCCTCGGAGTCGACGCGCAAGGCGGCGGAAGGGCCCTCGCCGTCATCGGAGGAGGCGGGGAAG	probable ureidoglycolate hydrolase [Setaria italica]
		IG100007210	0	0	0/1	0.24	NA	4.43	TGCAGCGGCTCCAGAGGATGAATCCTCTATTTTTAAAGGTCCAGGTTAGGTAACCGTTGCGGATAGTGT	NA
		IG100227584|F|0-47:T>C-47:T>C	0	28537600	T/C	0.17	NA	4.37	ATTCATAAGGGTCAGATGCTCAAGAAGTGGCAAGTGGAGAGCCCTGAGGTTCTCGTCCAGGAAACTGCA	NA
		IG100224015	0	0	0/1	0.24	NA	4.36	TGCAGTCACGTCTATTGACTGCTTTCTGCACTCGCTTCATTTGTGCCATCTCTTTGAGATCCAACAGCG	NA
		IG100006658	A01	16757118	0/1	0.24	NA	4.35	TGCAGCCTTCACCCGTCTGGTGCTTTGCAGCAGCCCTGATAACTCACCATTCCTCAATTTCCAAAGTTG	NA
		IG100002599	0	0	0/1	0.49	NA	4.34	TGCAGAGGTAAAAATAAGAACGGGAGAGAATGGCTTTTGGGCTACGGTGGCAGCCTGCTGGGGTTTGGA	NA
		IG100003311	B03	4760869	0/1	0.17	NA	4.3	TGCAGATCTTGCAAAGATCTTCCTCTTGCTGATAATGGAATGACACACTAGGAAATGTTTCAAAAATGC	NA
		IG100102205	0	0	0/1	0.49	NA	4.3	TGCAGCATTCTACCGTTGACCACACCAGCGAGCTTGGTGGCGCCCGTGAAGCCAGCTGCGGGGCGAGTC	NA
		IG100357456	A01	184091286	0/1	0.25	NA	4.3	CAAGGCACTGCGCTGATGCTGCTGAAGTTCAGCACCAACCCAATTTGCACGTGATGCTCCATTTCTGCA	putative oxidoreductase GLYR1 [Senna tora]
		IG100028141	A05	28279352	0/1	0.3	NA	4.27	TATTGCGCTCCTTCCACCATAACCAGAGGAGGCACATTACCTTCATTTGTTCGGCATCCTTCAACTGCA	retrotransposon protein, putative, unclassified [Oryza sativa Japonica Group]
		IG100322676	B04	101603239	0/1	0.4	NA	4.21	GACGACCAAAGTACCTAGCAGTAGCAATTTGGAGGTAGAAGAAGAAGGGAAAGGGAGGAGTTACCTGCA	beta-glucosidase 6-like [Panicum hallii]
		IG100208325|F|0-47:G>A-47:G>A	B05	54619688	G/A	0.2	NA	4.17	AGGGACCTAAGCTGCCTCTCACGGCGTTACTGTGTTGTACTCCCTCCATAAAGGCCCAGTACTGCTGCA	NA
		IG100013076	B01	144286837	0/1	0.45	NA	4.17	GGTGAACTTCCCGGCCTTACACATTTCTCCTCTCTCCGTAGCGGCTTCGCTGCGGTTCCACGTACTGCA	NA
		IG100097922|F|0-56:C>T-56:C>T	0	0	C/T	0.38	NA	4.15	TGCAGATTCAATTGCAGCGTGAATTCCTTGCCAGCGCAAGATGCCCTCTTTCCTTTCTTCCCATCCAAT	NA
		IG100011309	B06	23388469	0/1	0.22	NA	4.14	GCGGCGGTGGTACGGTGGAGCCTGCCTAGCTACATATGCCGCGCGCCTCCATATCCTCCCATCCCTGCA	NA
		IG100100735|F|0-9:T>C-9:T>C	B05	54577611	T/C	0.28	NA	4.08	TGCAGCAGCTGCTCGCCGTGCCGTAGTGGCCTGTACCTTTCGCCGCGGACTAGCGGCGCTGTTAATTTG	NA
		IG100004596	A03	70577603	0/1	0.42	NA	4.06	CCGTCATGTTCGACGCCAACTTGCTGGGCATACCAGGCCTGGATGACGAGTGAAAAACATTCTGCTGCA	NA
		IG100006709	B05	49282489	0/1	0.34	NA	4.05	TACATACAAAGAAAGTTAAGCACAGAGCACAGAGGGAGGCGGAGAGAGACAAGCAAAGCAAAGGCTGCA	NA
		IG100334526	A04	29127268	0/1	0.4	NA	4.04	TGCAGCTTAAAGTCCCGAGCTACTGCCTGCTATCTCCGTCATCCGCTCCAAAATCTGTTGGTCTGCTAG	NA
		IG100021821	0	0	0/1	0.29	NA	4.01	TGCAGGAGAGCGCGAGCGCGAGCGCGCTGAGCGAGCTGCGGTGCTCGTAGCCG	NA
	ST	IG9899553|F|0-39:A>G-39:A>G	B03	72723522	A/G	0.34	NA	5.13	TGCAGGATTTGCTCATTGCTTTCGTGCTGTGTGGTGTCAAGTGTTTGGCTATTTGCTCAGCCG	NA
		IG100250216|F|0-40:A>G-40:A>G	B02	124430378	A/G	0.11	NA	4.9	TGCAGGGTGGGGCCCACGTACCAGCGAGAGGACCCGTGAGAAAGAGACAAAAGGAAGGCCG	NA
		IG18095269|F|0-20:C>T-20:C>T	A07	89214569	C/T	0.28	NA	4.64	CGTGCCCGCCCAGGTGCGTGAACAGGAGCGACGGCCAGTAACCCACCAGCGGGCCCGACCCCAGCTGCA	NEP-interacting protein 1 [Zea mays]
		IG100208838	A02	133339952	0/1	0.48	NA	4.54	TGCAGCATGCTGTATTCTTCTGATGAATGCAAGAAGACATGCAAATTACTCAATGTGCAATTACAGAAA	NA
		IG100218221|F|0-64:G>C-64:G>C	A07	69668465	G/C	0.19	NA	4.38	AGGTCTGATACGGACGGACCTACGGGGGAAGGTGGGTACCGAACCTAACTACCCAGCCACATGCCTGCA	NA
		IG100012220	A02	7049626	0/1	0.36	NA	4.31	TGCAGGTCTCGTACATACTCCACCCGCAATCGTACGTAGCTCAACCACAGTGGCCTACTACTGTACCTC	NA
		IG100005922	A01	181294870	0/1	0.31	NA	4.11	TCGGAGACAGAAGAGGCGACGAAAGTTGGCGCTAGTAGTAGTAGGAAGAGCAGGAGGCACATGGCTGCA	LOW QUALITY PROTEIN: leucine-rich repeat receptor protein kinase MSL1 [Setaria italica]
		IG100266183|F|0-59:C>G-59:C>G	B02	161255385	C/G	0.19	NA	4.11	GCCGAGCTGGCCGCTGAGCGTCTTCTGGATGTAATTGGCGACCTCGATGGGCGACTTGCCACCGCTGCA	glycerol-3-phosphate 2-O-acyltransferase 6 [Sorghum bicolor]
		IG100356310|F|0-7:G>C-7:G>C	0	40627402	G/C	0.2	NA	4.08	TGCAGGCGTCGATGATGAGCGCGGTGCAATCCGCCGCGTAGTGCGTCGCGGCCTCGCAGCTGCTCGCGG	NA
		IG100285245	B07	6358189	0/1	0.4	NA	4.02	CGGCGGCTGTTCGGTCATCTCCGTCGTGTCGCCCCTGCTGCTGCA	NA
		IG100105802|F|0-38:A>G-38:A>G	B02	134400541	A/G	0.07	NA	4	TGCAGCGCTGCCGCTGATGAAATATATGTGGAGGATTCAACAGGCAGCGATCGAGAGGATCACTAGCTA	NA
