# Supplementary material for: Insights Into the Genetic Architecture of Complex Traits in Napier Grass (Cenchrus purpureus) and QTL Regions Governing Forage Biomass Yield, Water Use Efficiency and Feed Quality Traits
Source: Front Plant Sci. 2022 Jan 7;12:678862. doi: 10.3389/fpls.2021.678862 (PMC8776657; doi:10.3389/fpls.2021.678862)
Supplement: Supplementary file 4 [file Table_3.xlsx]

## Sheet: Sheet1
Supplementary Table 3. Common markers across the three soil moisture conditions. Genomic positions, contrasting alleles, minor allele frequency (MAF), and P values from the mixed linear model (MLM) are shown.
Soil moisture condition	Trait	Marker	AC	Pos	Allele	MAF	The -log10 P value
							WS-RF	DS-MWS	DS-SWS
WS-RF + DS-MWS + DS-SWS	TN	IG100028141	A05	28279352	0/1	0.3	4.84	4.61	4.27
	TN	IG100007210	0	0	0/1	0.24	4.53	4.84	4.43
	TN	IG100029702	A01	194732797	0/1	0.27	4.32	4.36	4.34
WS-RF + DS-MWS	PH	IG100003500	A07	64113866	0/1	0.27	4.21	4.29	NA
	LL	IG100000697	B02	170471983	0/1	0.07	5.04	4.09	NA
	LW	IG100007430	B03	27169784	0/1	0.1	7.35	4.2	NA
	LW	IG100092244	B02	141889888	0/1	0.06	5.3	4.18	NA
	TN	IG100004922	B01	95804657	0/1	0.29	4.47	4.02	NA
	TN	IG18165199|F|0-33:A>G-33:A>G	B05	101808649	A/G	0.2	4.41	4.86	NA
	TN	IG100276656|F|0-50:C>T-50:C>T	A07	65279888	C/T	0.25	4.34	6.96	NA
	ST	IG100000697	B02	170471983	0/1	0.07	5.04	4.09	NA
WS-RF + DS-SWS	LL	IG100001981	B01	4027858	0/1	0.11	4.18	NA	5.23
	LL	IG100000353	B01	4043781	0/1	0.11	4.18	NA	5.23
	LL	IG100098908	B01	5078283	0/1	0.11	4.18	NA	5.23
	TN	IG100224015	0	0	0/1	0.24	4.29	NA	4.36
	TN	IG100322676	B04	101603239	0/1	0.4	5.11	NA	4.21
DS-MWS	PH	IG100218301	A02	46585403	0/1	0.22	NA	5.08	5.12
+
DS- SWS
AC = assembled chromosome; Pos. = position in a chromosome; WS-RF = wet season under rainfed condition; DS-MWS = dry season under moderate water stress condition; DS-SWS = dry season under severe water stress condition.
